# Supplementary material for: The Metabolite Profiling of Aspergillus fumigatus KMM4631 and Its Co-Cultures with Other Marine Fungi
Source: MDPI journal article supplement (doi:10.3390/metabo13111138), 2023-11-08
Supplement: s1 [file s1]

---

SUPPLEMENTARY MATERIALS

**Metabolite Profiling of *Aspergillus fumigatus* KMM4631 and its  
Co-Cultures with Other Marine Fungi**

---

## Contents

|                                                                                                                                                      |    |
|------------------------------------------------------------------------------------------------------------------------------------------------------|----|
| <b>Figure S1.</b> UHPLC MS chromatogram of extract of <i>Aspergillus fumigatus</i> KMM 4631 monoculture. ....                                        | 4  |
| <b>Figure S2.</b> UHPLC MS chromatogram of extract of <i>Penicillium hispanicum</i> KMM 4689 monoculture. ....                                       | 4  |
| <b>Figure S3.</b> UHPLC MS chromatogram of extract of <i>Aspergillus fumigatus</i> KMM 4631+ <i>Penicillium hispanicum</i> KMM 4689 co-culture. .... | 5  |
| <b>Figure S4.</b> UHPLC MS chromatogram of extract of <i>Amphichorda</i> sp. KMM 4639 monoculture. ....                                              | 5  |
| <b>Figure S5.</b> UHPLC MS chromatogram of extract of <i>Aspergillus fumigatus</i> KMM 4631+ <i>Amphichorda</i> sp. KMM 4639 co-culture. ....        | 6  |
| <b>Figure S6.</b> UHPLC MS chromatogram of extract of <i>Penicillium</i> sp. KMM 4672 monoculture. ....                                              | 6  |
| <b>Figure S7.</b> UHPLC MS chromatogram of extract of <i>Aspergillus fumigatus</i> KMM 4631+ <i>Penicillium</i> sp. KMM 4672 co-culture. ....        | 7  |
| <b>Figure S8.</b> UHPLC MS chromatogram of extract of <i>Asteromyces cruciatus</i> KMM 4696 monoculture. ....                                        | 7  |
| <b>Figure S9.</b> UHPLC MS chromatogram of extract of <i>Aspergillus fumigatus</i> KMM 4631+ <i>Asteromyces cruciatus</i> KMM 4696 co-culture. ....  | 8  |
| <b>Figure S10.</b> MS/MS fragmentation of fumiquinazoline C (3) and D (4). ....                                                                      | 8  |
| <b>Figure S11.</b> MS/MS fragmentation of fumiquinazoline K (6). ....                                                                                | 9  |
| <b>Figure S12.</b> MS/MS of tryptoquivaline J (9) and F (5). ....                                                                                    | 9  |
| <b>Figure S13.</b> MS/MS fragmentation of fumiquinazoline F (10). ....                                                                               | 10 |
| <b>Figure S14.</b> MS/MS fragmentation of pseurotin A (11) and D (15). ....                                                                          | 10 |
| <b>Figure S15.</b> MS/MS fragmentation of conjugated linoleic acid (10E,12Z) (12). ....                                                              | 11 |
| <b>Figure S16.</b> MS/MS fragmentation of 2-chloroemodin (13). ....                                                                                  | 11 |
| <b>Figure S17.</b> MS/MS fragmentation of scytalone (14). ....                                                                                       | 12 |
| <b>Figure S18.</b> MS/MS fragmentation of agroclavine (16). ....                                                                                     | 12 |
| <b>Figure S19.</b> MS/MS fragmentation of fumigaclavine A (17). ....                                                                                 | 13 |
| <b>Figure S20.</b> MS/MS fragmentation of pyripyropene A (18). ....                                                                                  | 13 |
| <b>Figure S21.</b> MS/MS fragmentation of fumiquinazoline G (19). ....                                                                               | 14 |
| <b>Figure S22.</b> MS/MS fragmentation of ergosterol peroxide (20). ....                                                                             | 14 |
| <b>Figure S23.</b> MS/MS fragmentation of emodin (21). ....                                                                                          | 15 |
| <b>Figure S24.</b> MS/MS fragmentation of diorcin (54). ....                                                                                         | 15 |
| <b>Figure S25.</b> MS/MS fragmentation of isaridin E (55). ....                                                                                      | 16 |
| <b>Figure S26.</b> MS/MS fragmentation of isaridin B (56). ....                                                                                      | 16 |
| <b>Figure S27.</b> MS/MS fragmentation of isariin (58). ....                                                                                         | 17 |
| <b>Figure S28.</b> MS/MS fragmentation of psuedodestruxin C (60). ....                                                                               | 17 |

---

|                                                                                                                                                |    |
|------------------------------------------------------------------------------------------------------------------------------------------------|----|
| <b>Figure S29.</b> MS/MS fragmentation of desmethylisaridin E (61).....                                                                        | 18 |
| <b>Figure S30.</b> MS/MS fragmentation of isaridin F (62).....                                                                                 | 18 |
| <b>Figure S31.</b> MS/MS fragmentation of 1,4a-dimethyl-9-oxo-7-propan-2-yl-3,4,10,10a-tetrahydro-2H-phenanthrene-1-carboxylic acid (63). .... | 19 |
| <b>Figure S32.</b> MS/MS fragmentation of viridicatol (64). ....                                                                               | 19 |
| <b>Figure S33.</b> MS/MS fragmentation of citriperazine D (75). ....                                                                           | 20 |
| <b>Figure S34.</b> MS/MS fragmentation of pretrichodermamide C (76).....                                                                       | 20 |
| <b>Figure S35.</b> MS/MS fragmentation of N-methylpretrichodermamide B (77). ....                                                              | 21 |
| <b>Figure S36.</b> MS/MS fragmentation of pretrichodermamide D (78).....                                                                       | 21 |
| <b>Figure S37.</b> MS/MS fragmentation of coniothyronone B (86). ....                                                                          | 22 |
| <b>Figure S38.</b> MS/MS fragmentation of 9,10-anthracenedione (88).....                                                                       | 22 |
| <b>Figure S39.</b> MS/MS fragmentation of trans-3,4-dihydroxy-3,4-dihydroanofinic acid (89). ....                                              | 23 |
| <b>Figure S40.</b> MS/MS fragmentation of indolelactic acid (94).....                                                                          | 23 |
| <b>Table S1.</b> Experimental UPLC MS data for reference compounds.....                                                                        | 24 |

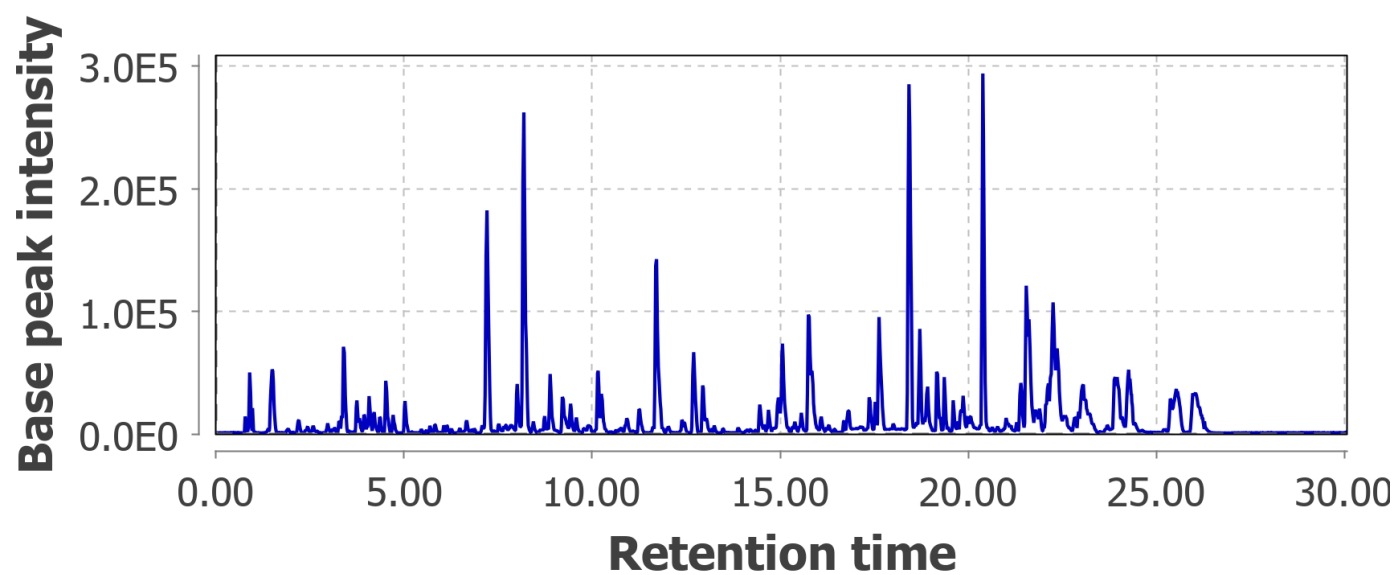

**Figure S1.** UHPLC MS chromatogram of extract of *Aspergillus fumigatus* KMM 4631 monoculture.

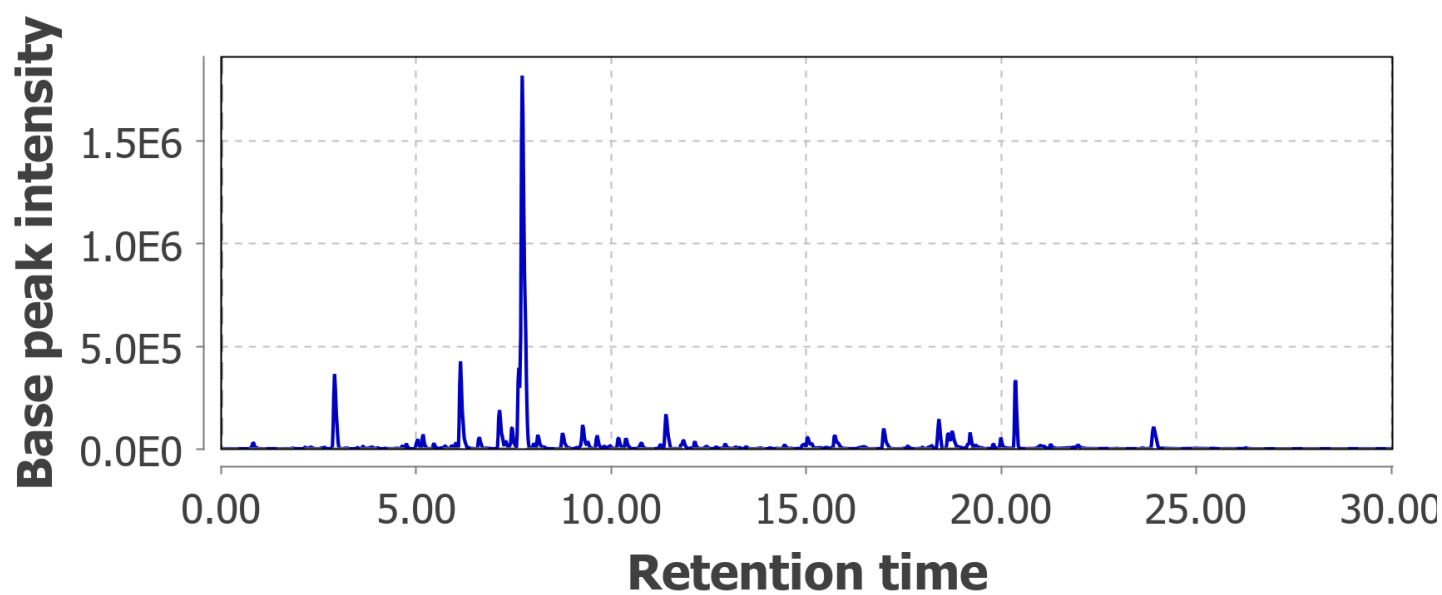

**Figure S2.** UHPLC MS chromatogram of extract of *Penicillium hispanicum* KMM 4689 monoculture.

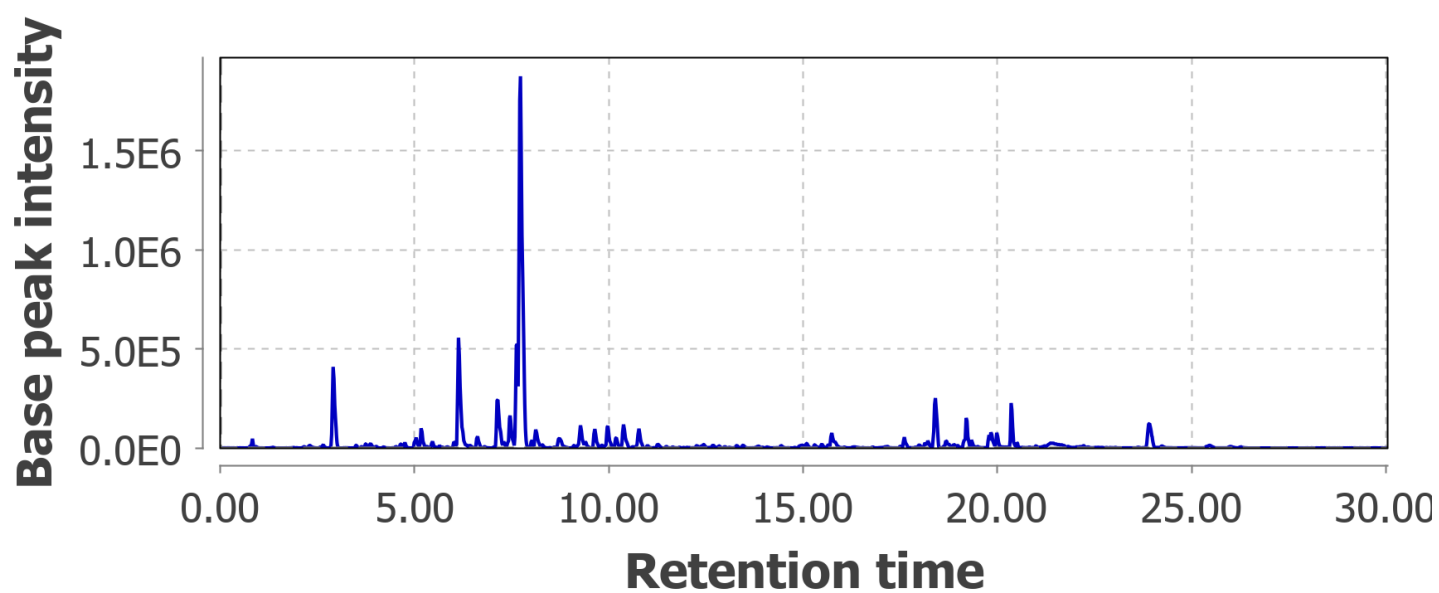

**Figure S3.** UHPLC MS chromatogram of extract of *Aspergillus fumigatus* KMM 4631+ *Penicillium hispanicum* KMM 4689 co-culture.

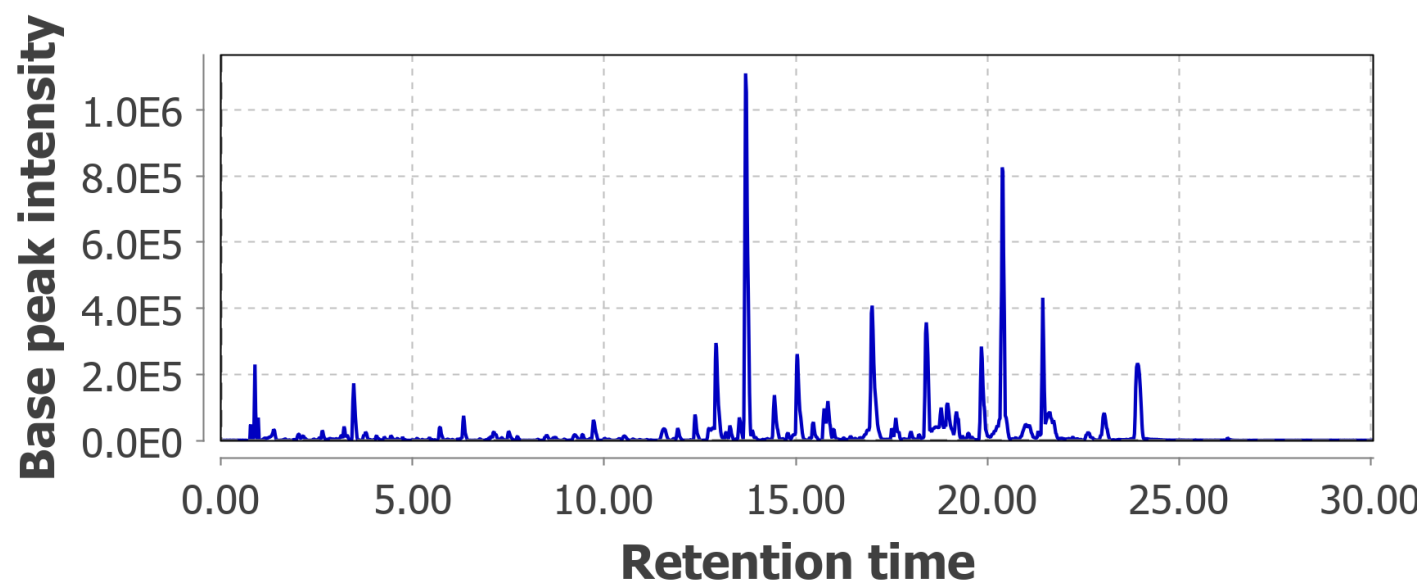

**Figure S4.** UHPLC MS chromatogram of extract of *Amphichorda* sp. KMM 4639 monoculture.

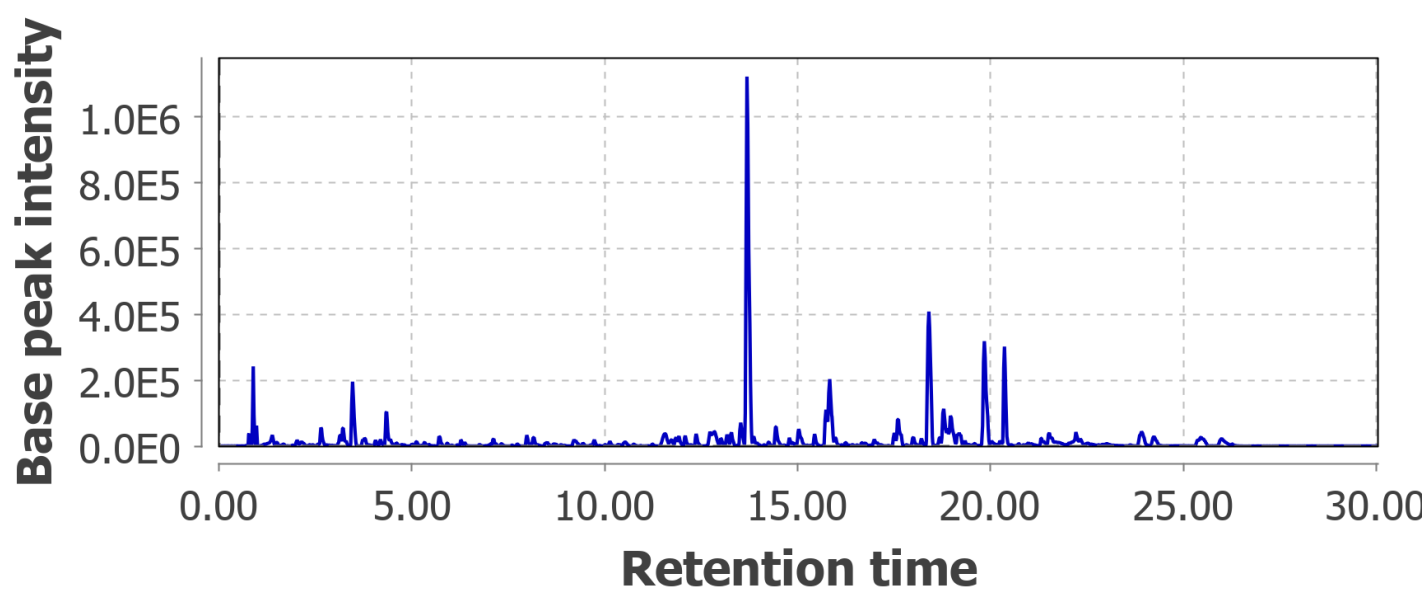

**Figure S5.** UHPLC MS chromatogram of extract of *Aspergillus fumigatus* KMM 4631+*Amphichorda* sp. KMM 4639 co-culture.

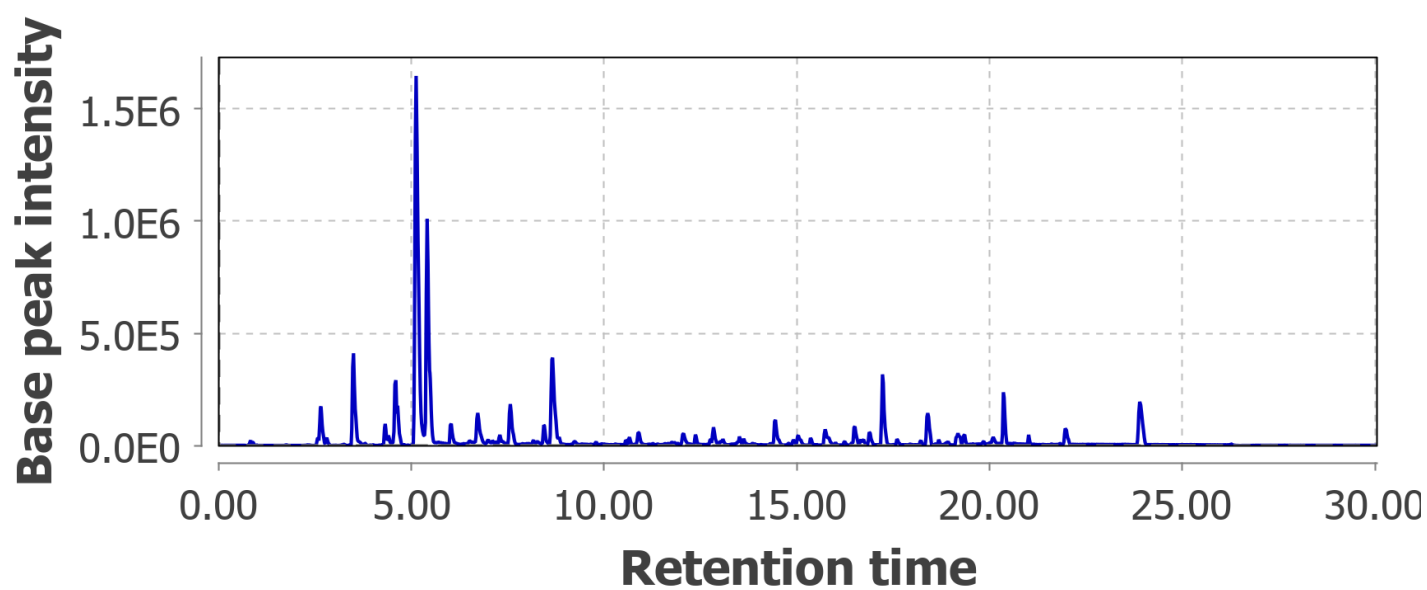

**Figure S6.** UHPLC MS chromatogram of extract of *Penicillium* sp. KMM 4672 monoculture.

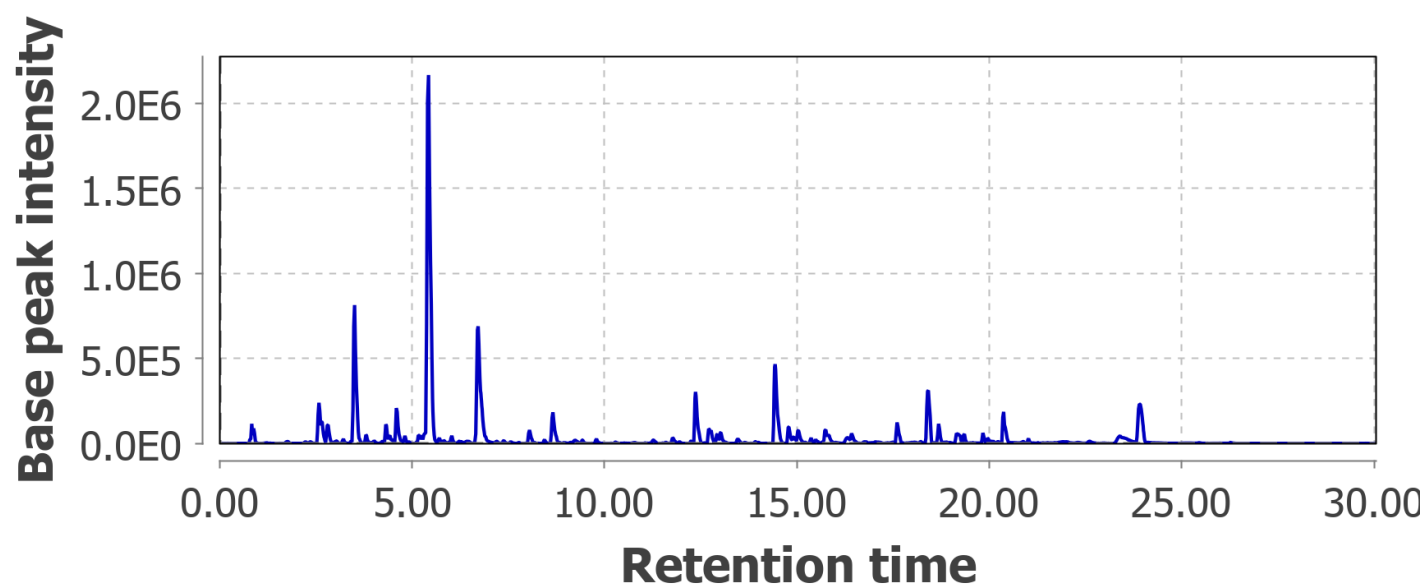

**Figure S7.** UHPLC MS chromatogram of extract of *Aspergillus fumigatus* KMM 4631+*Penicillium* sp. KMM 4672 co-culture.

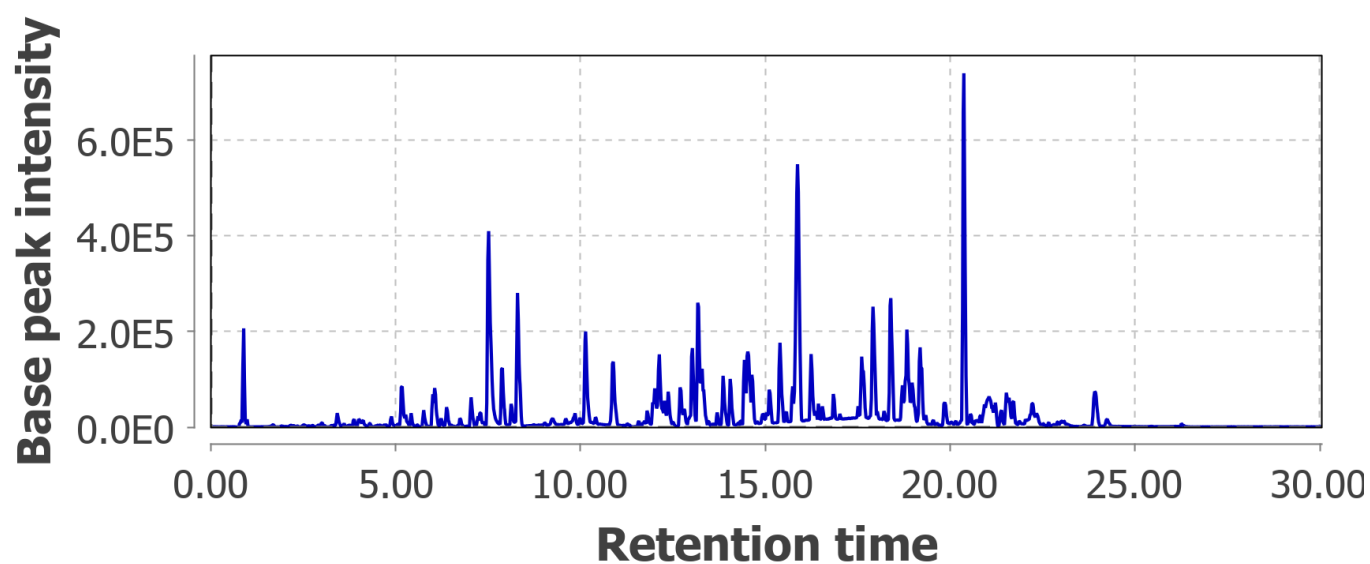

**Figure S8.** UHPLC MS chromatogram of extract of *Asteromyces cruciatus* KMM 4696 monoculture.

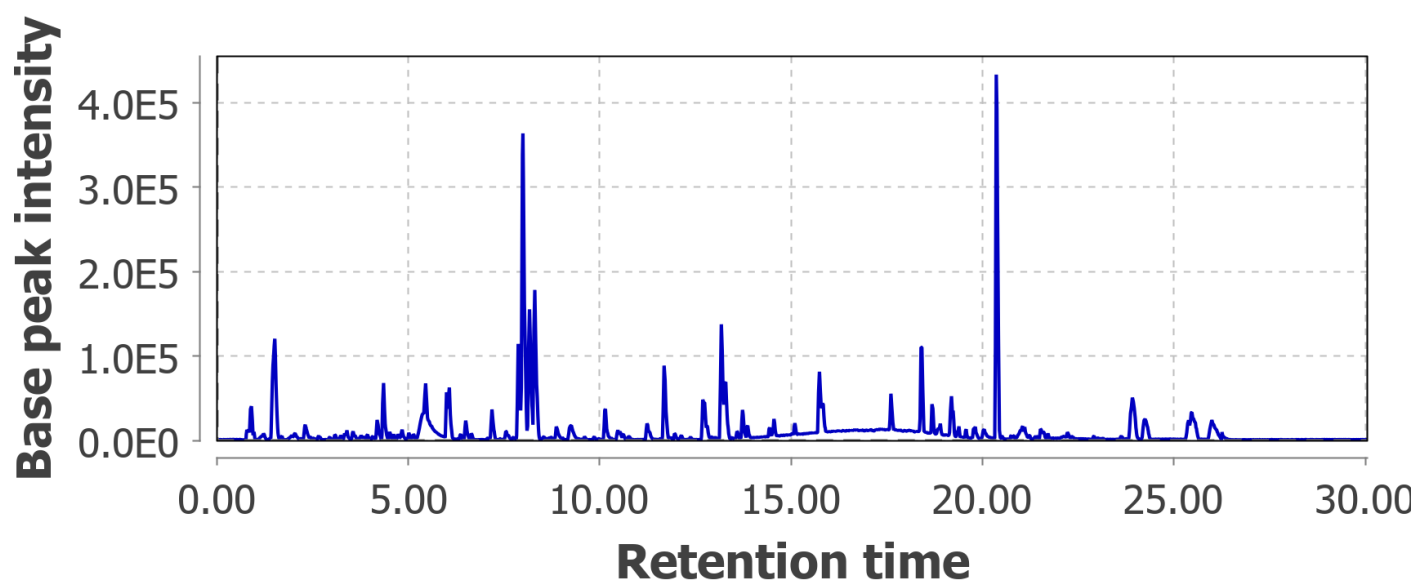

**Figure S9.** UHPLC MS chromatogram of extract of *Aspergillus fumigatus* KMM 4631+ *Asteromyces cruciatus* KMM 4696 co-culture.

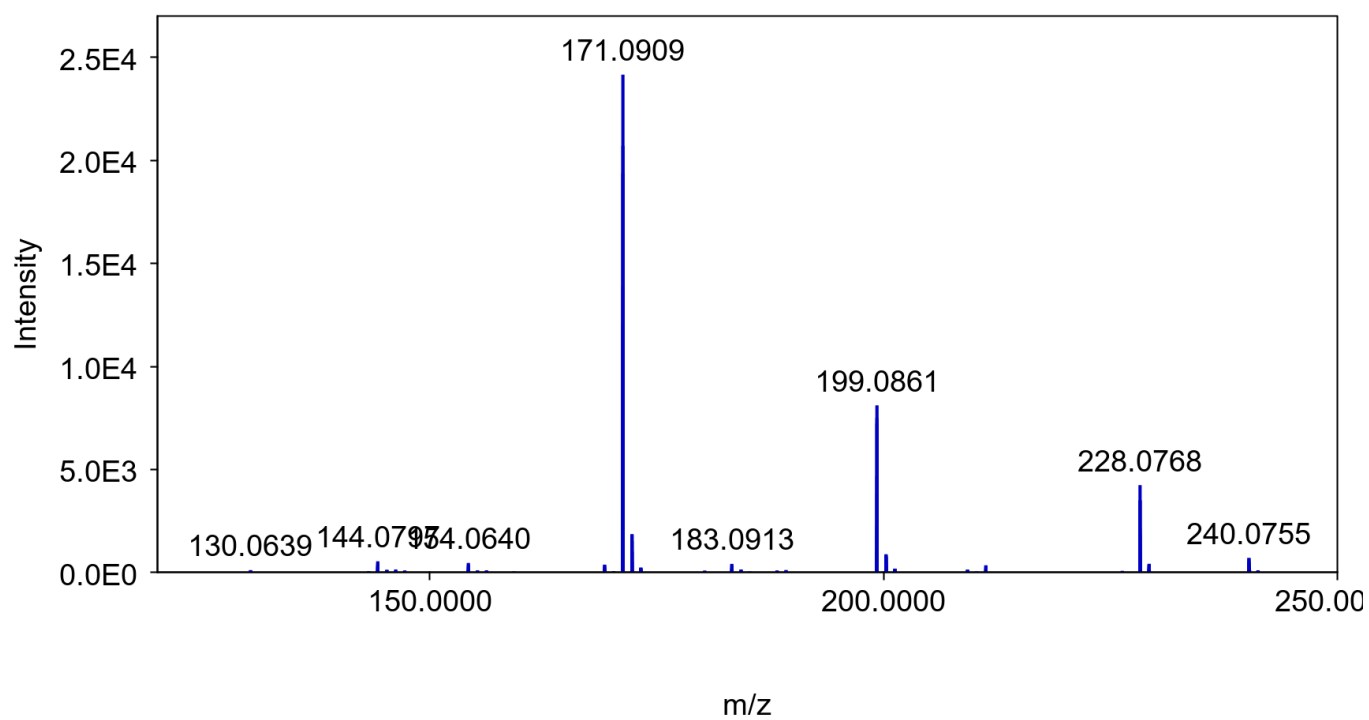

**Figure S10.** MS/MS fragmentation of fumiquinazoline C (3) and D (4).



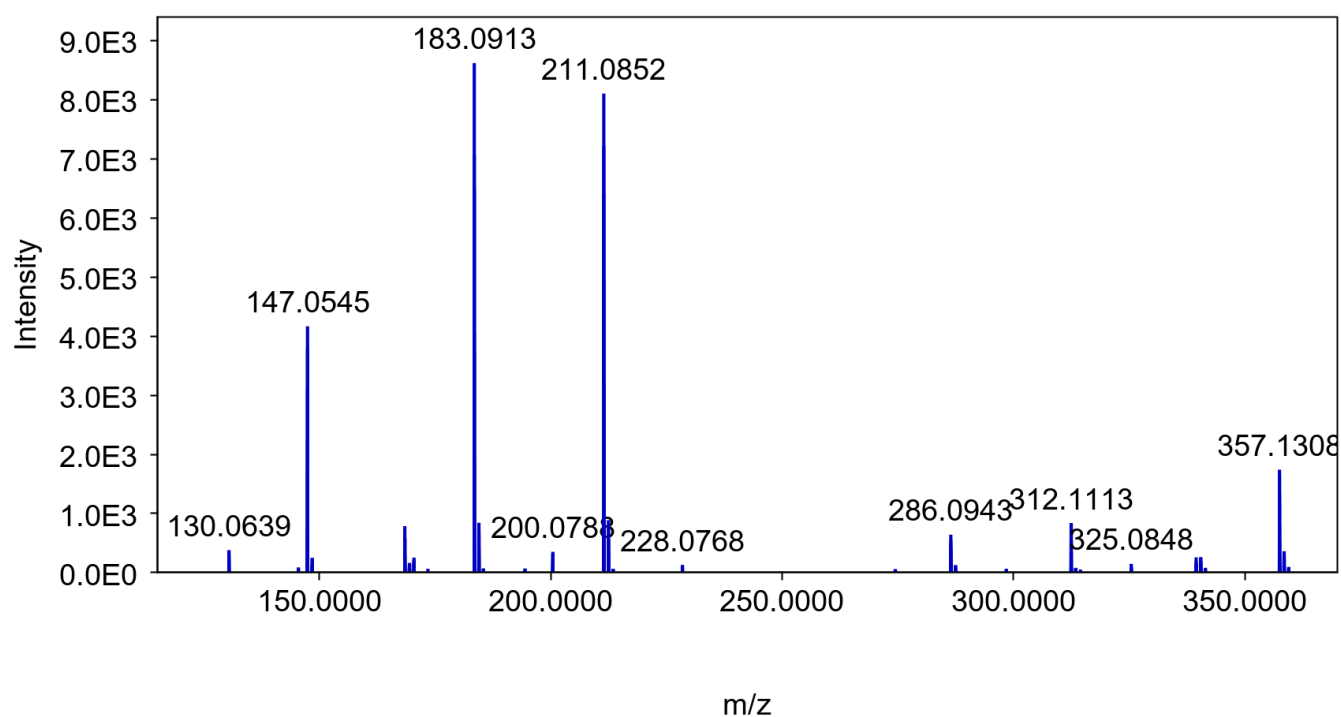

Figure S11. MS/MS fragmentation of fumiquinazoline K (6).

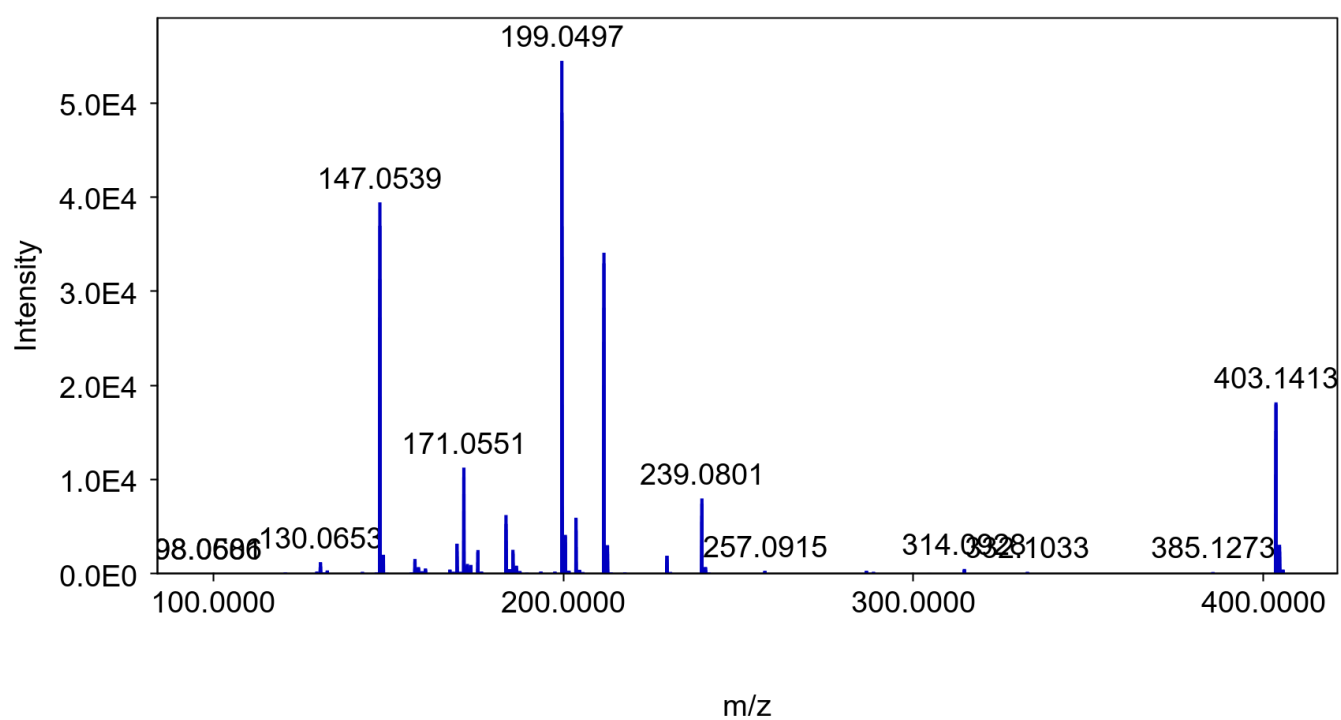

Figure S12. MS/MS of tryptoquivaline J (9) and F (5).

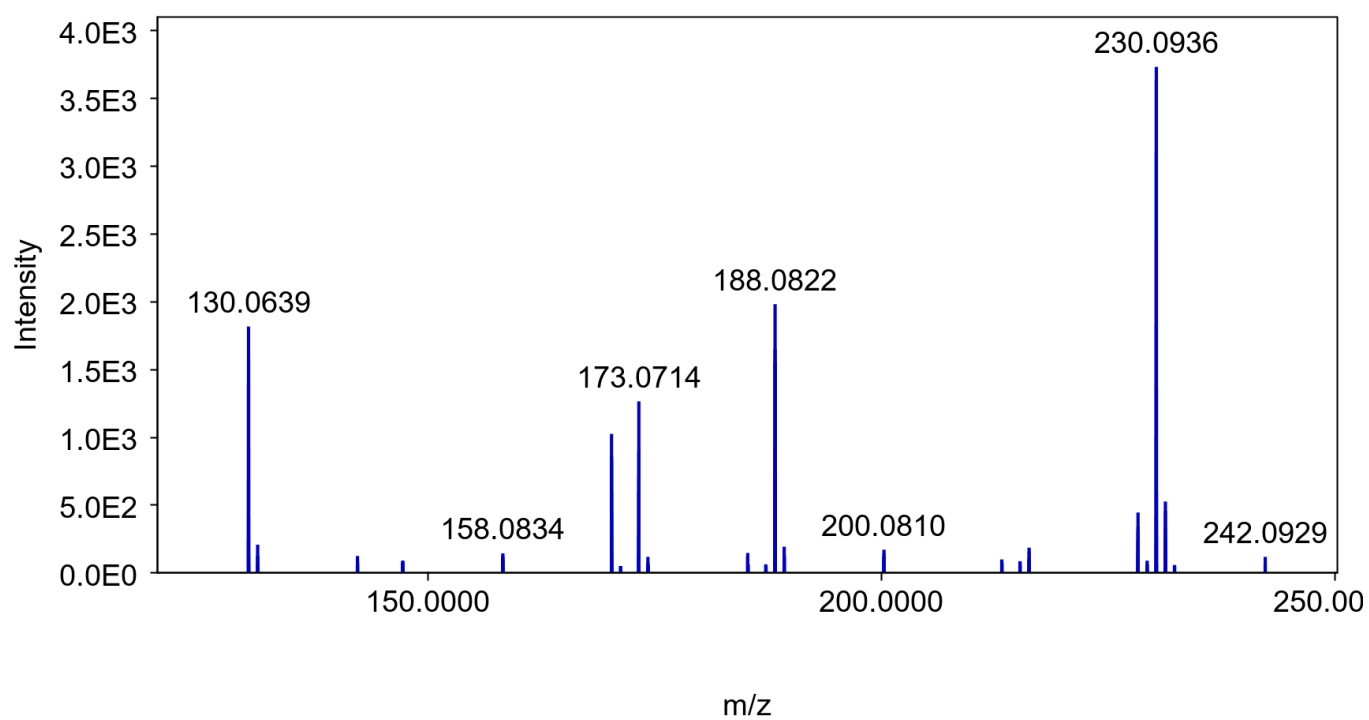

**Figure S13.** MS/MS fragmentation of fumiquinazoline F (10).

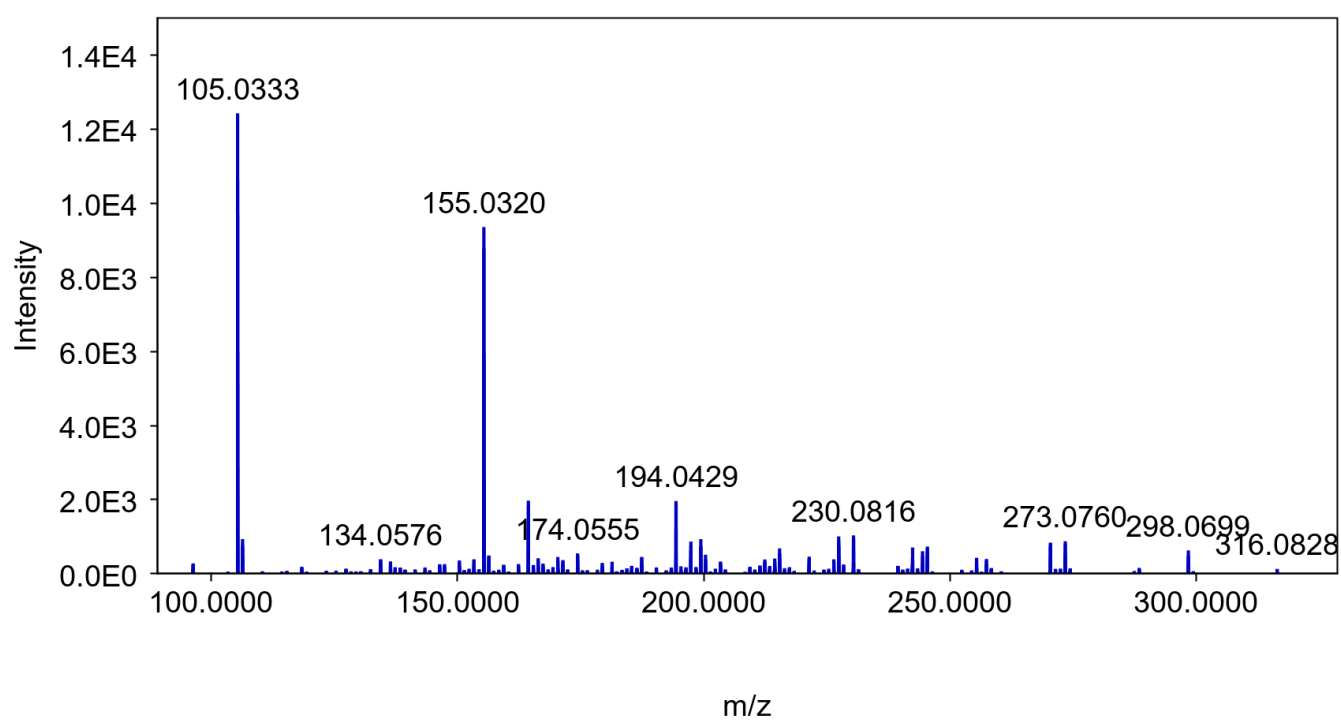

**Figure S14.** MS/MS fragmentation of pseurotin A (11) and D (15).

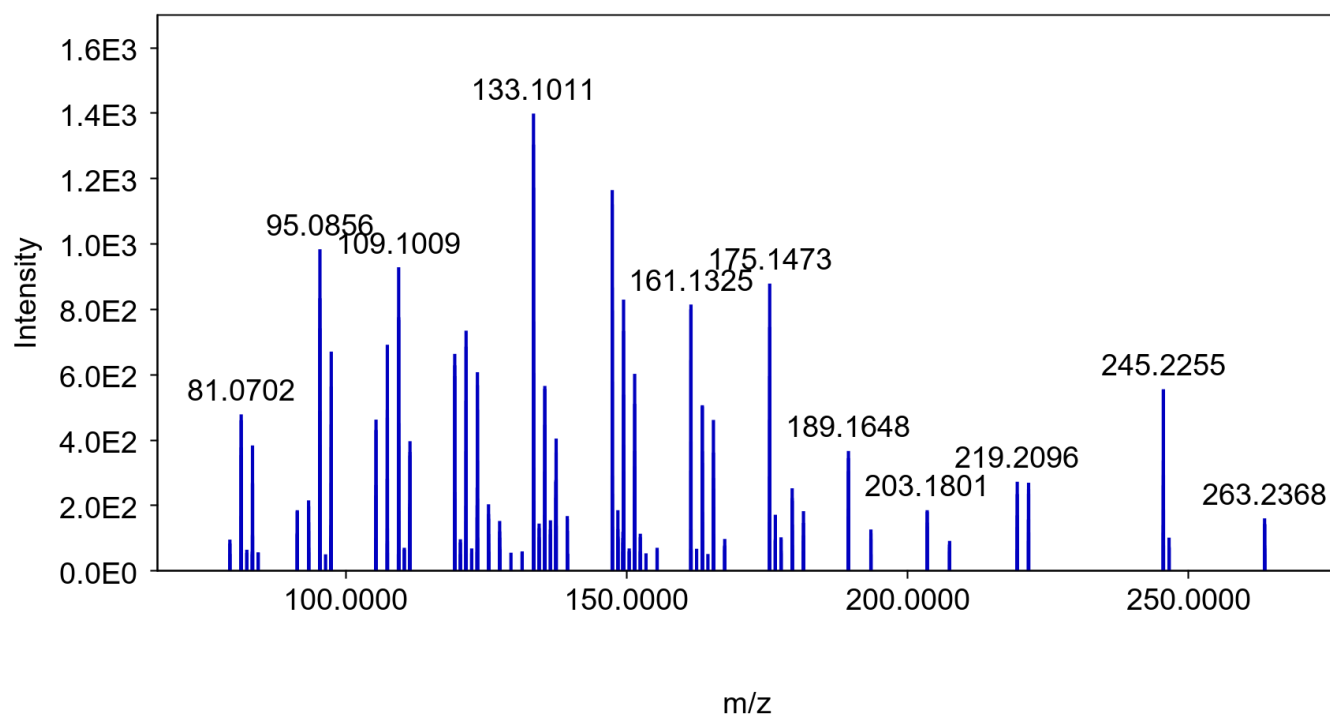

**Figure S15.** MS/MS fragmentation of conjugated linoleic acid (10E,12Z) (12).

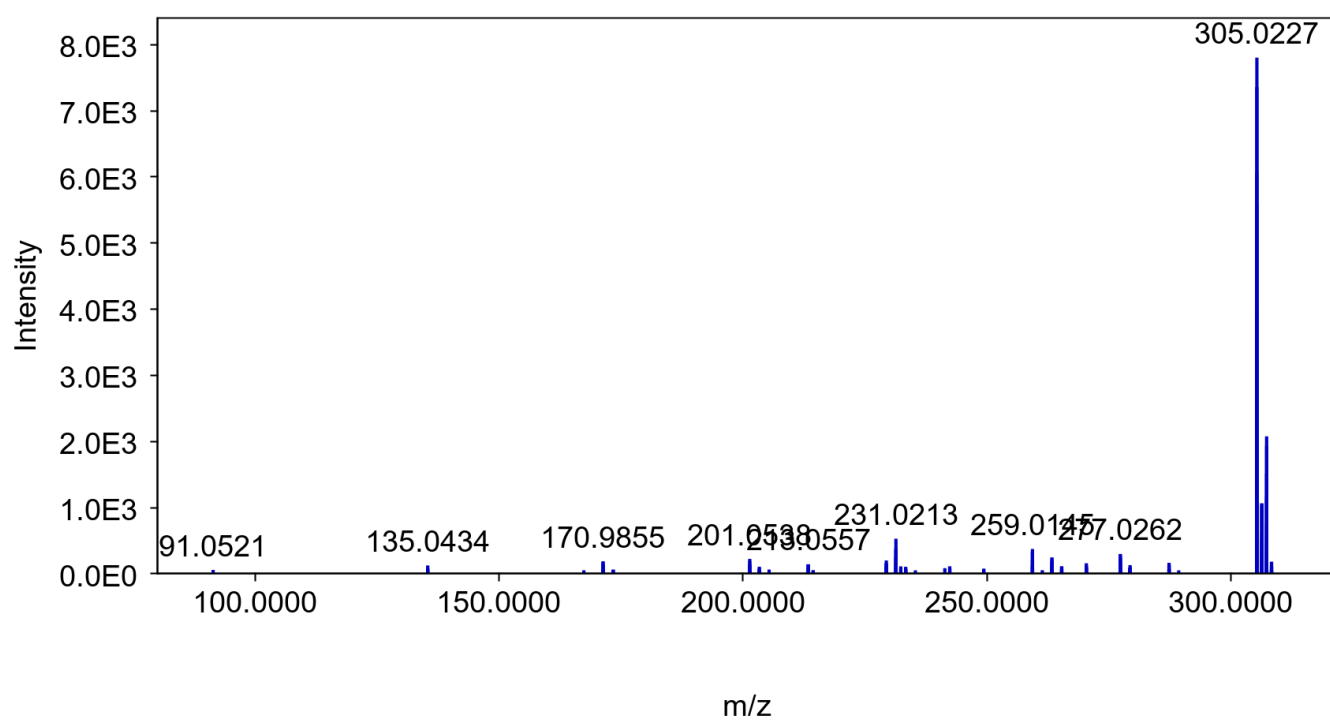

**Figure S16.** MS/MS fragmentation of 2-chloroemodin (13).

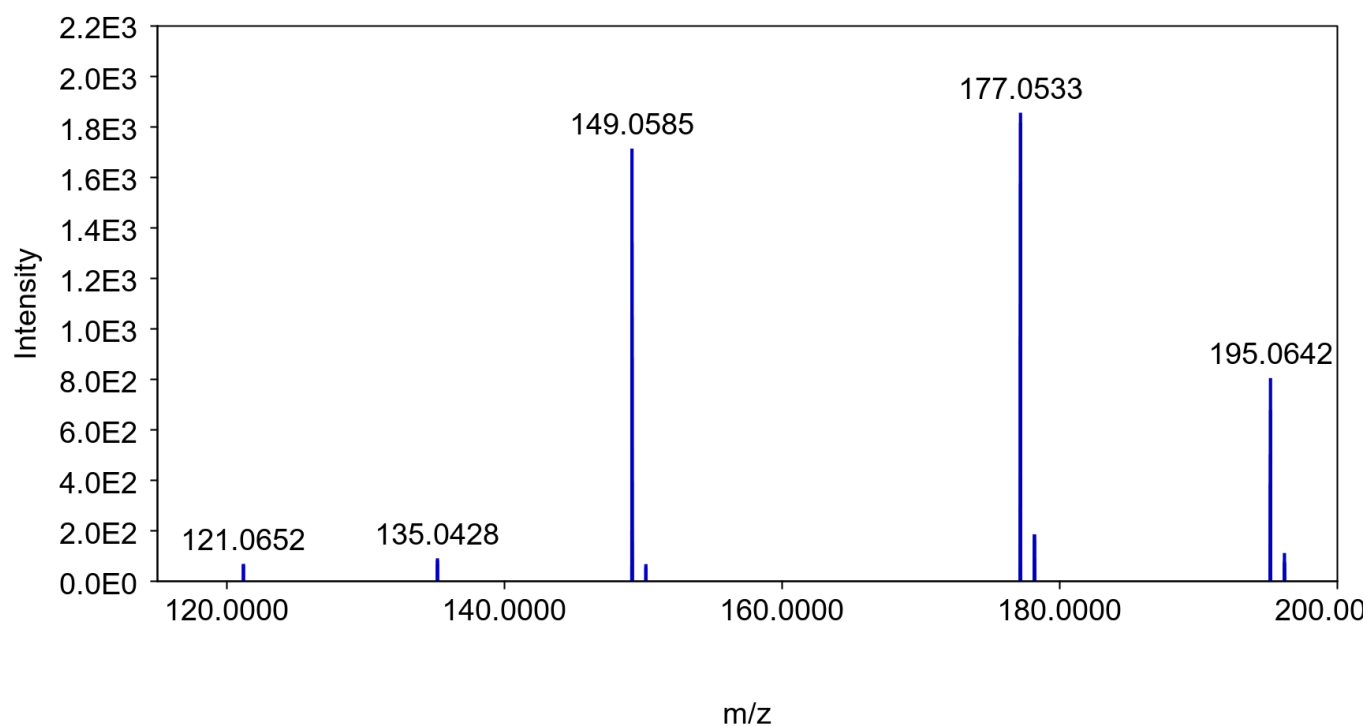

Figure S17. MS/MS fragmentation of scytalone (14).

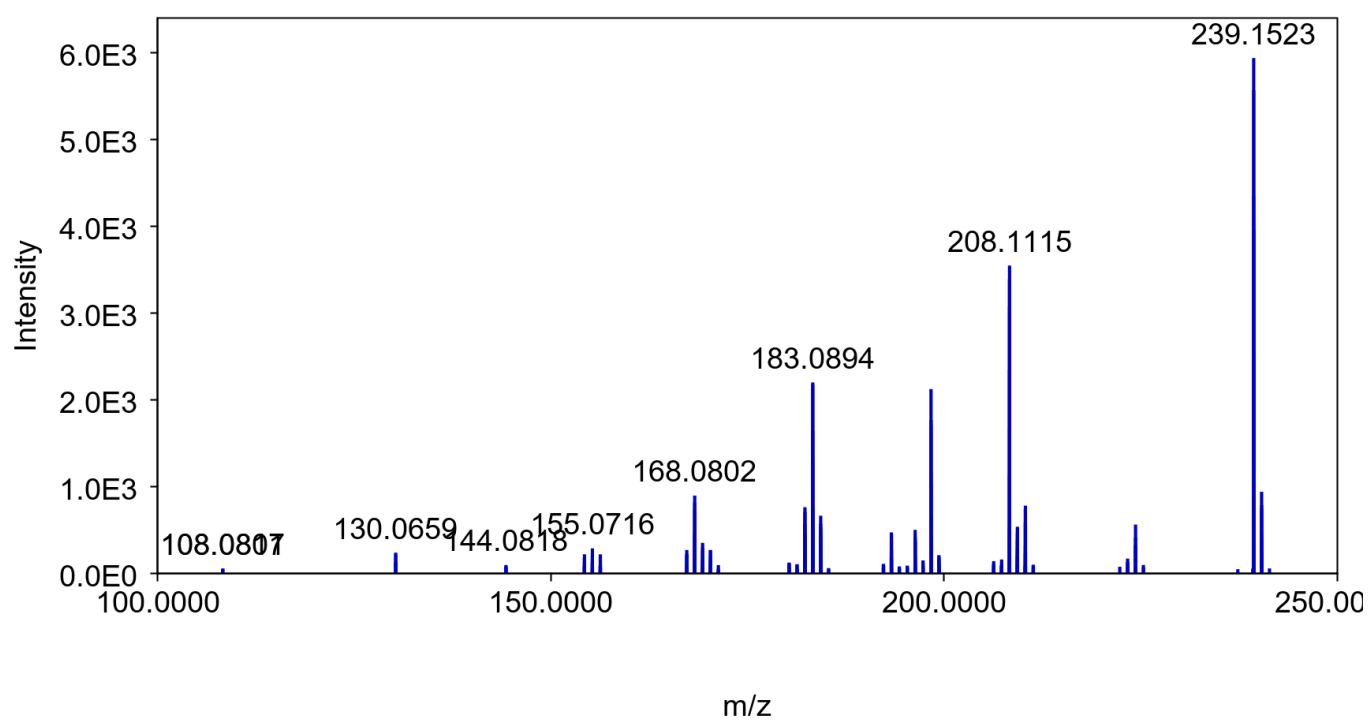

Figure S18. MS/MS fragmentation of agroclavine (16).

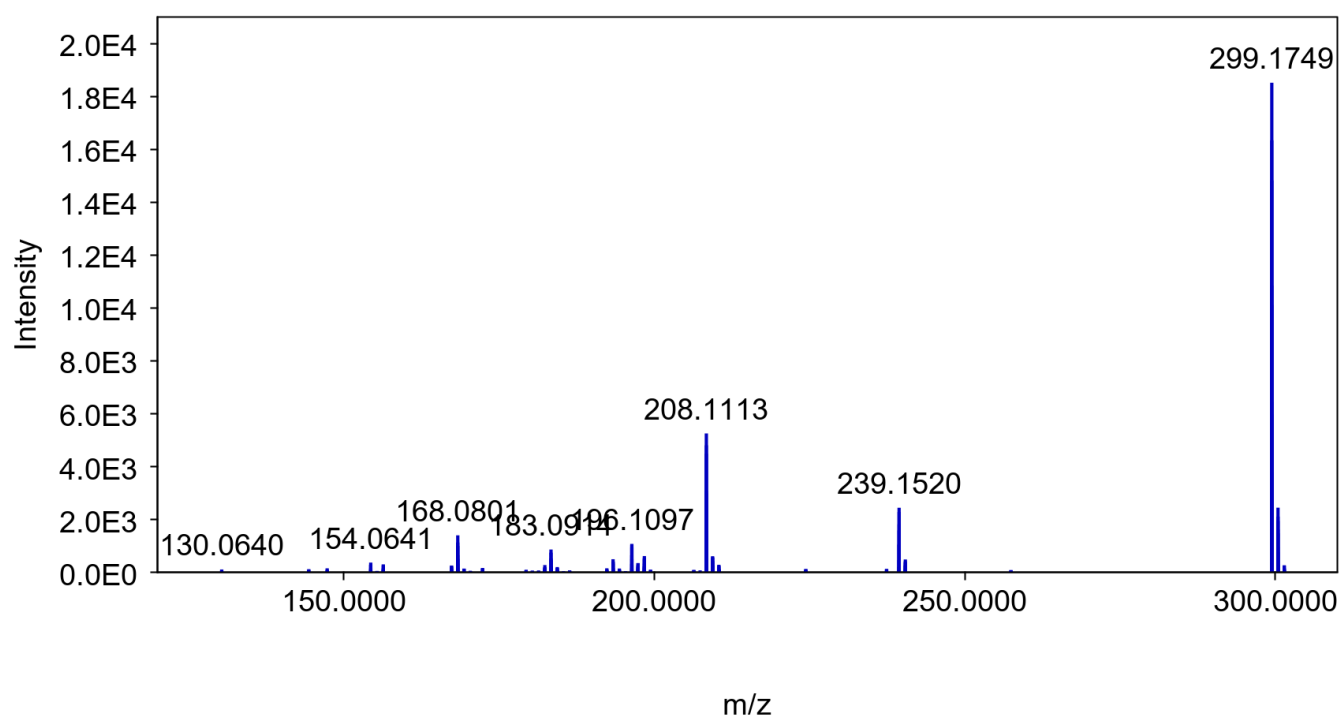

**Figure S19.** MS/MS fragmentation of fumigaclavine A (17).

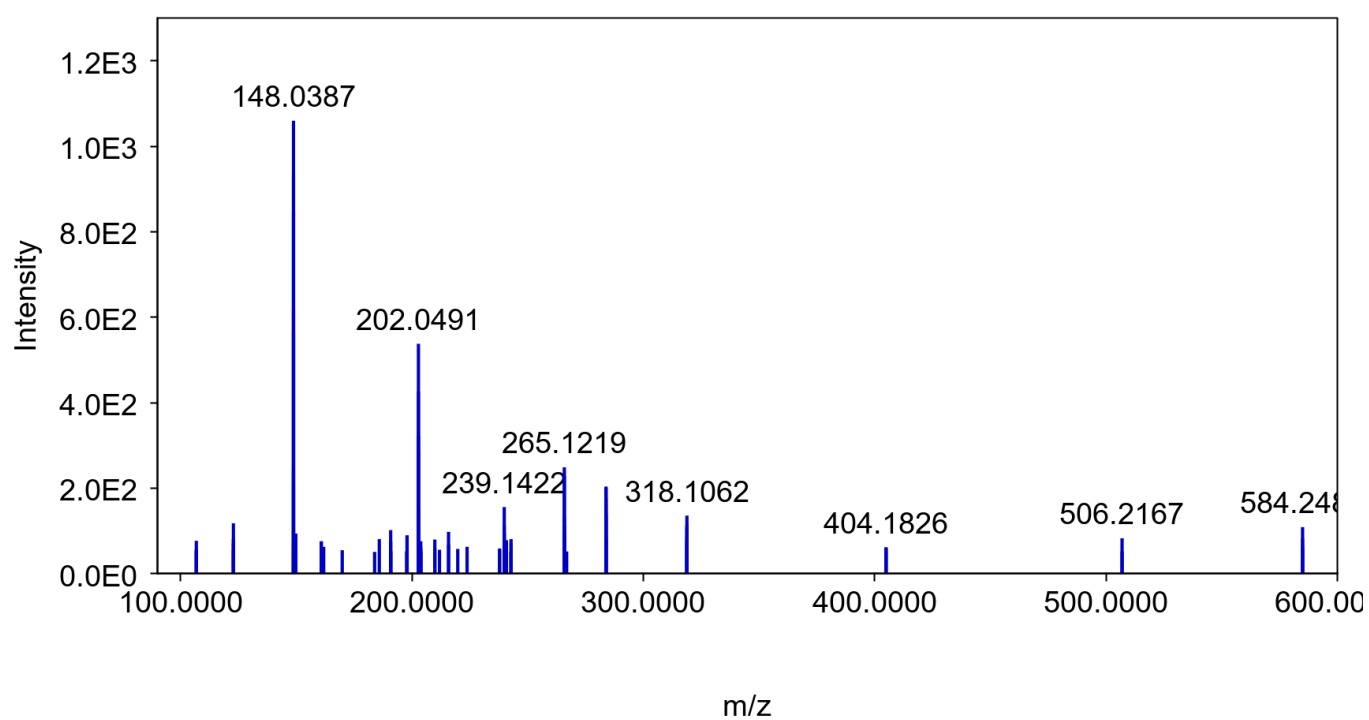

**Figure S20.** MS/MS fragmentation of pyripyropene A (18).

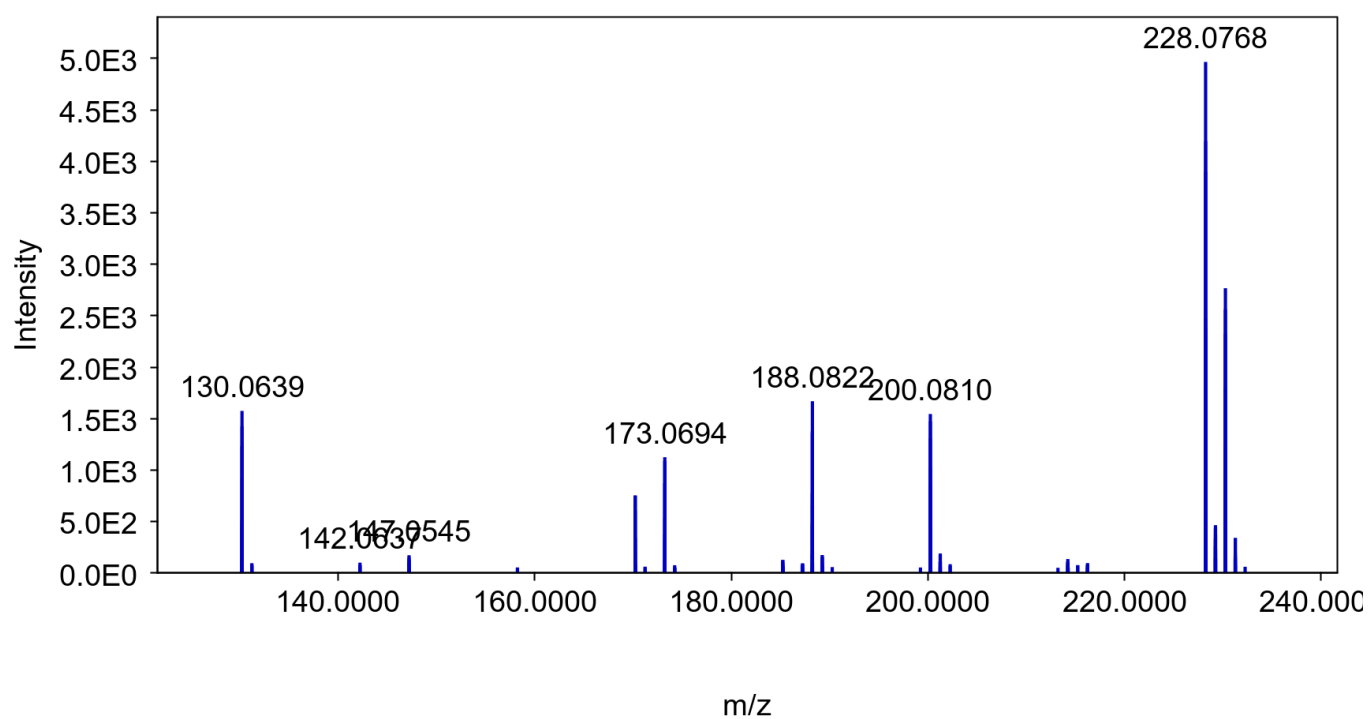

Figure S21. MS/MS fragmentation of fumiquinazoline G (19).

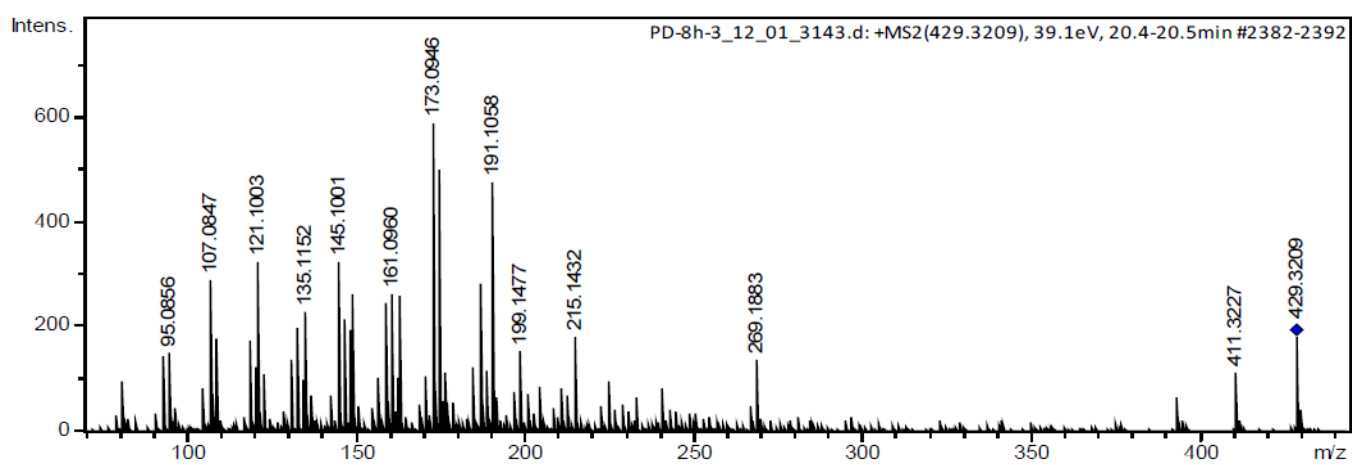

Figure S22. MS/MS fragmentation of ergosterol peroxide (20).

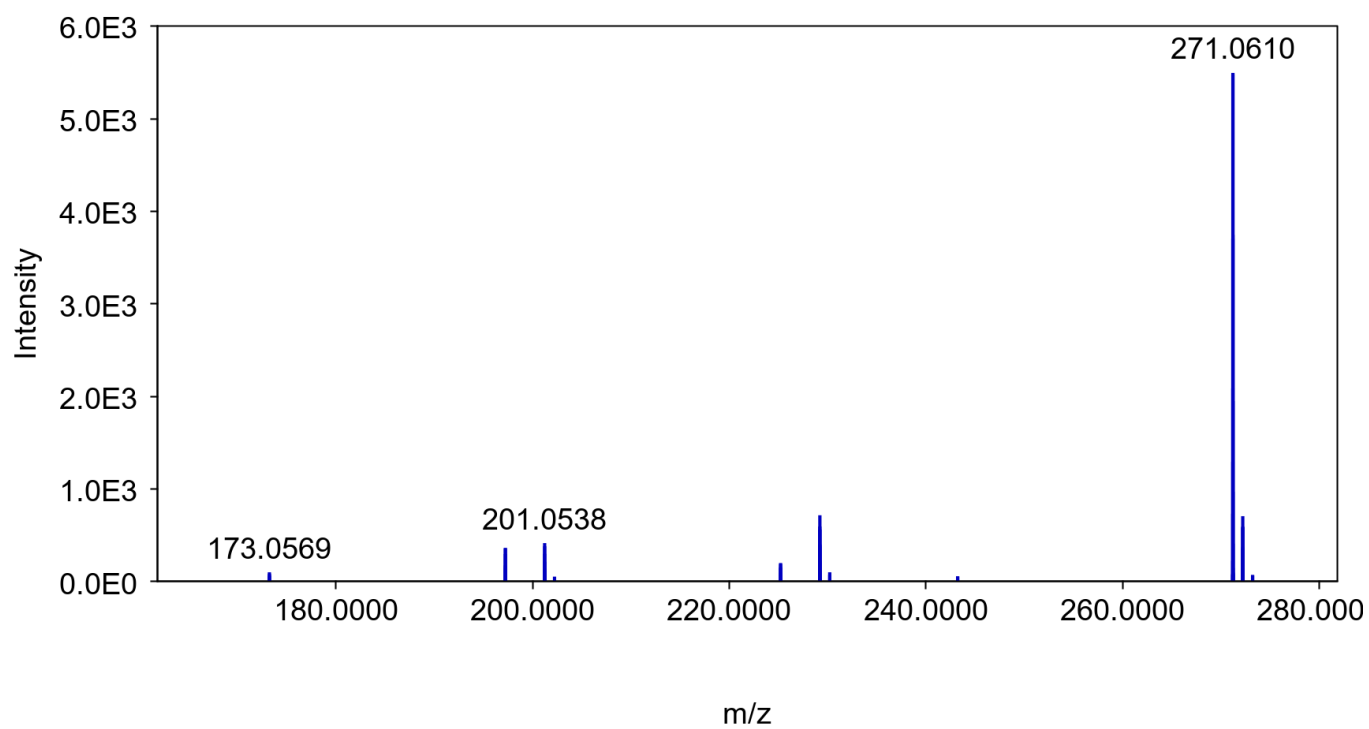

Figure S23. MS/MS fragmentation of emodin (21).

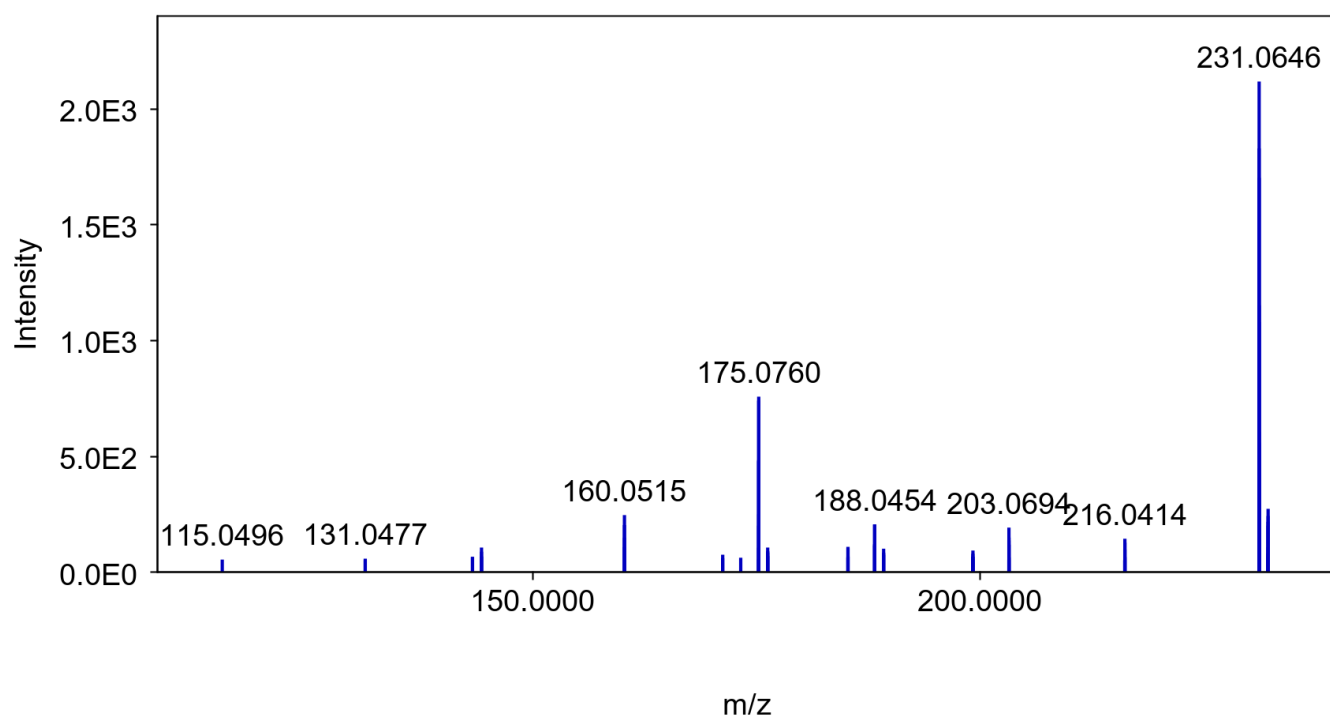

Figure S24. MS/MS fragmentation of diorcin (54).

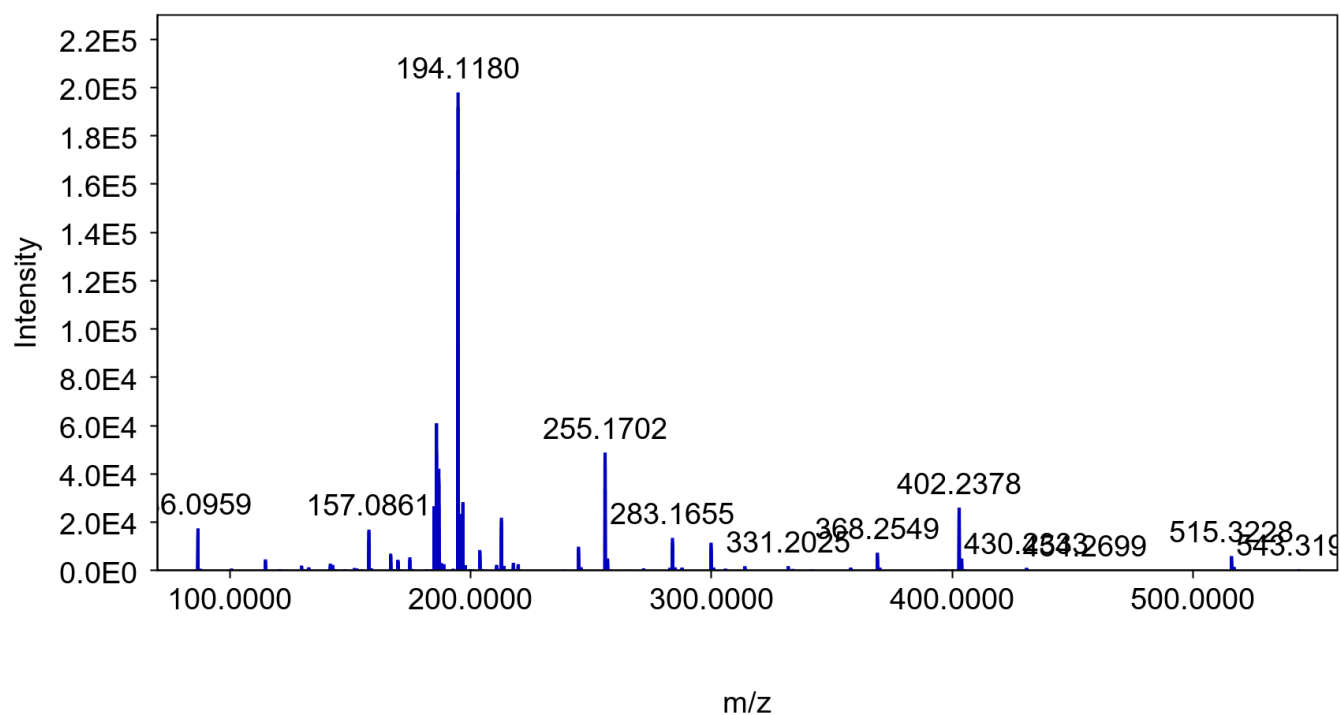

Figure S25. MS/MS fragmentation of isaridin E (55).

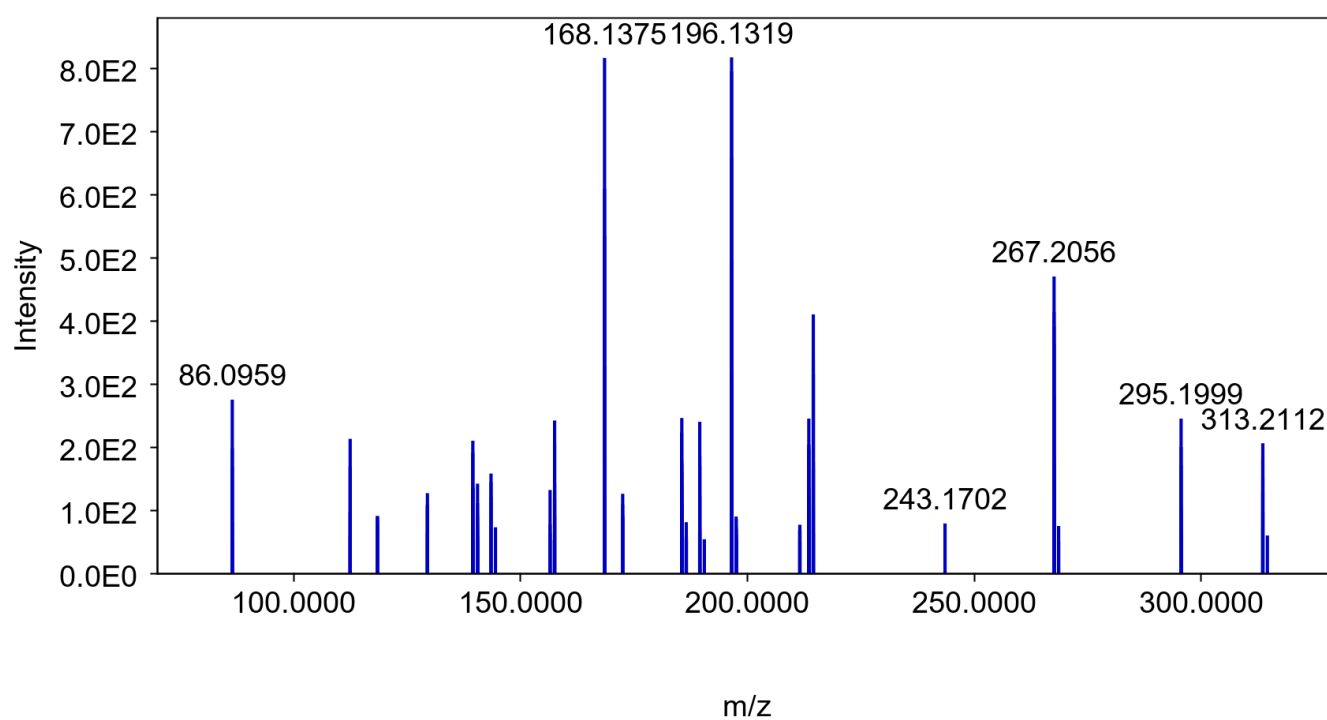

Figure S26. MS/MS fragmentation of isaridin B (56).



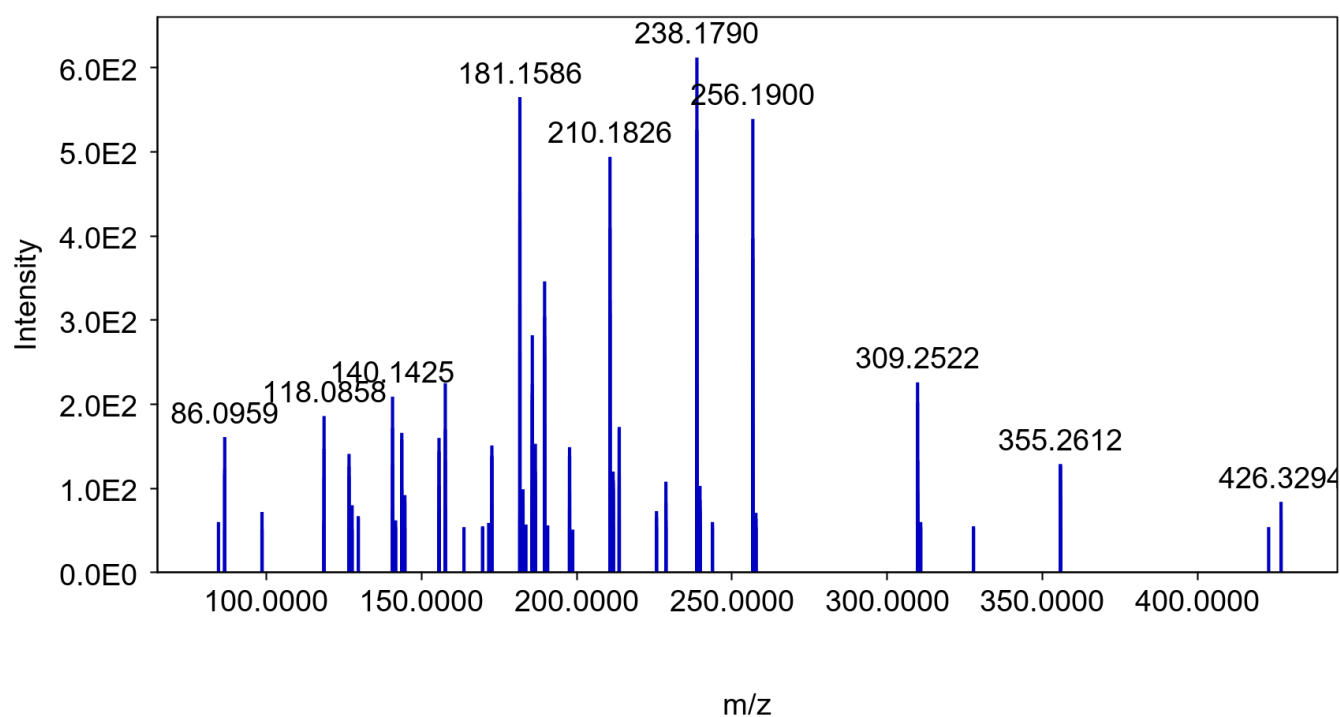

**Figure S27.** MS/MS fragmentation of isariin (58).

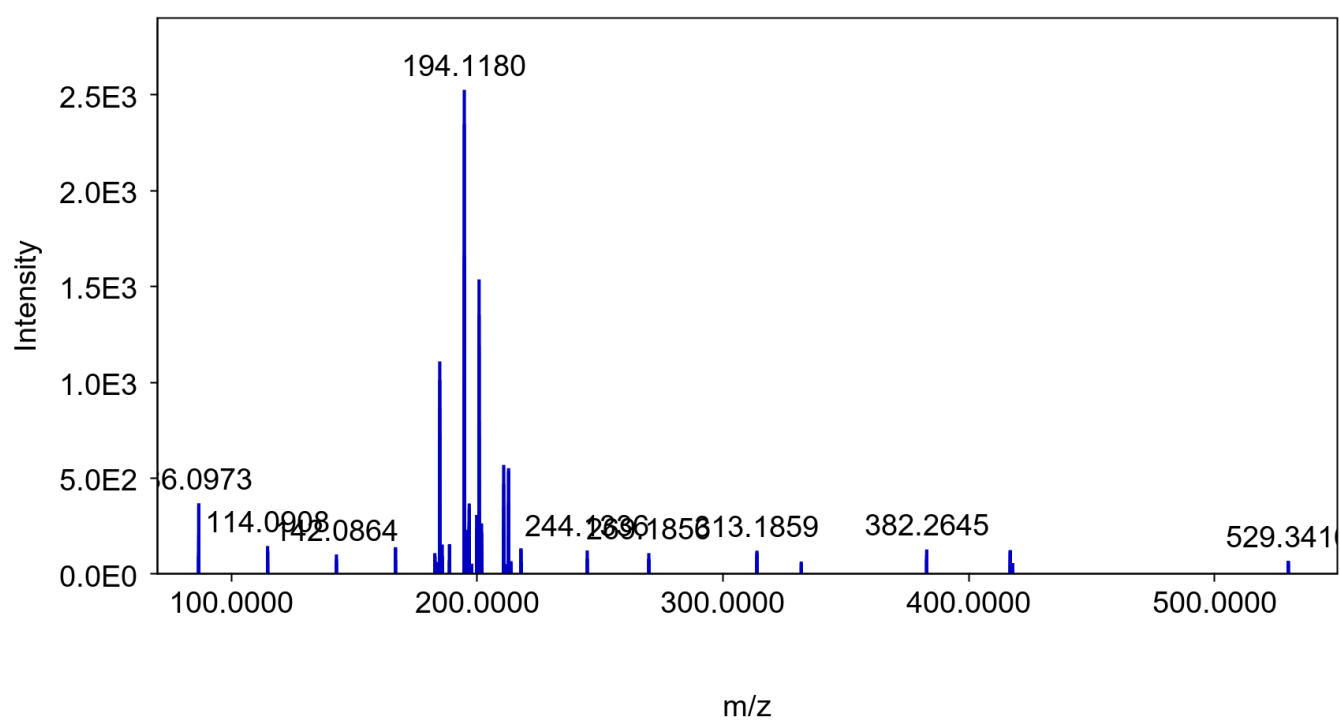

**Figure S28.** MS/MS fragmentation of psuedodestruxin C (60).

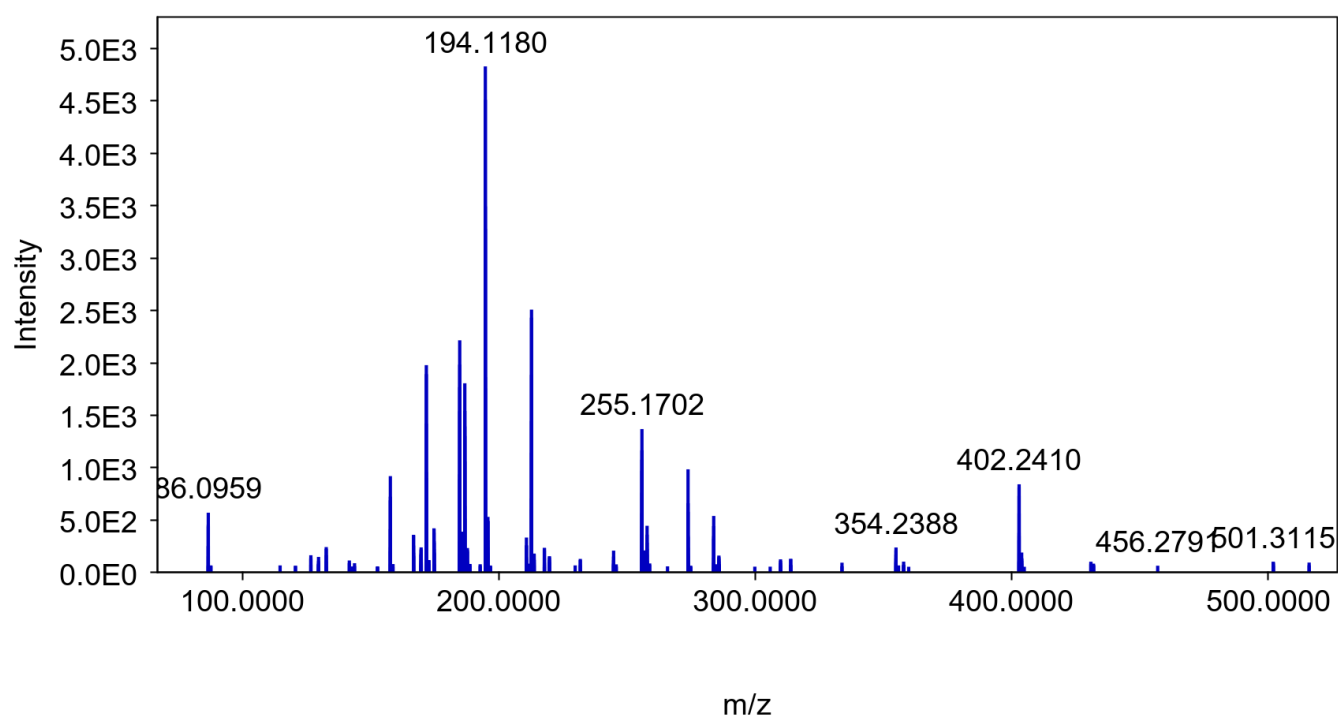

Figure S29. MS/MS fragmentation of desmethyrisaridin E (61).

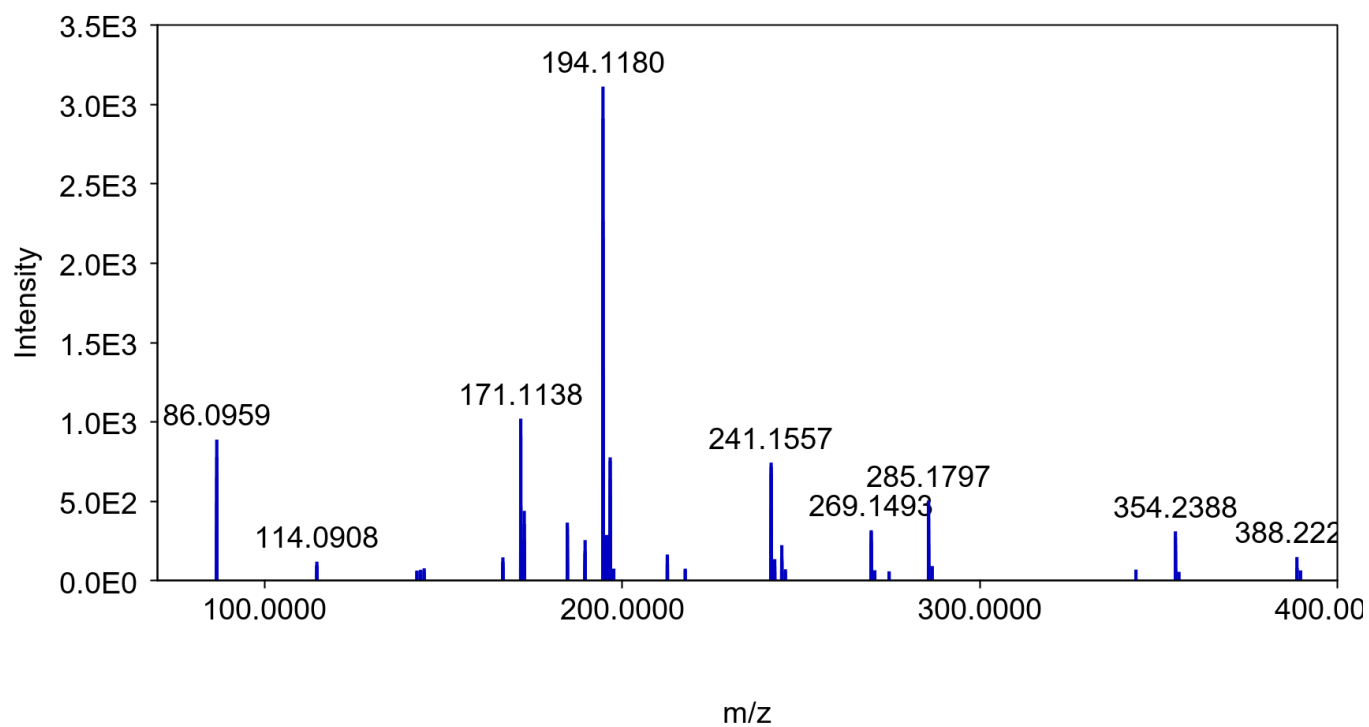

Figure S30. MS/MS fragmentation of isaridin F (62).

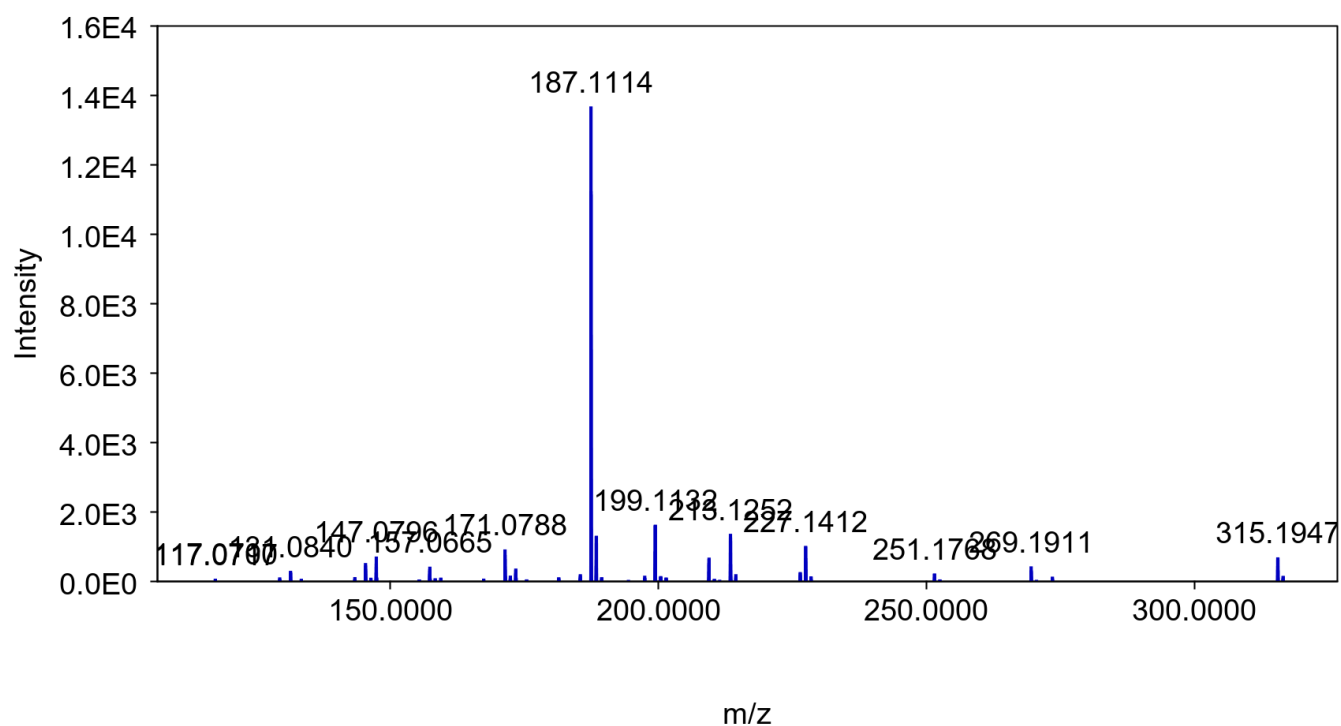

**Figure S31.** MS/MS fragmentation of 1,4a-dimethyl-9-oxo-7-propan-2-yl-3,4,10,10a-tetrahydro-2H-phenanthrene-1-carboxylic acid (63).

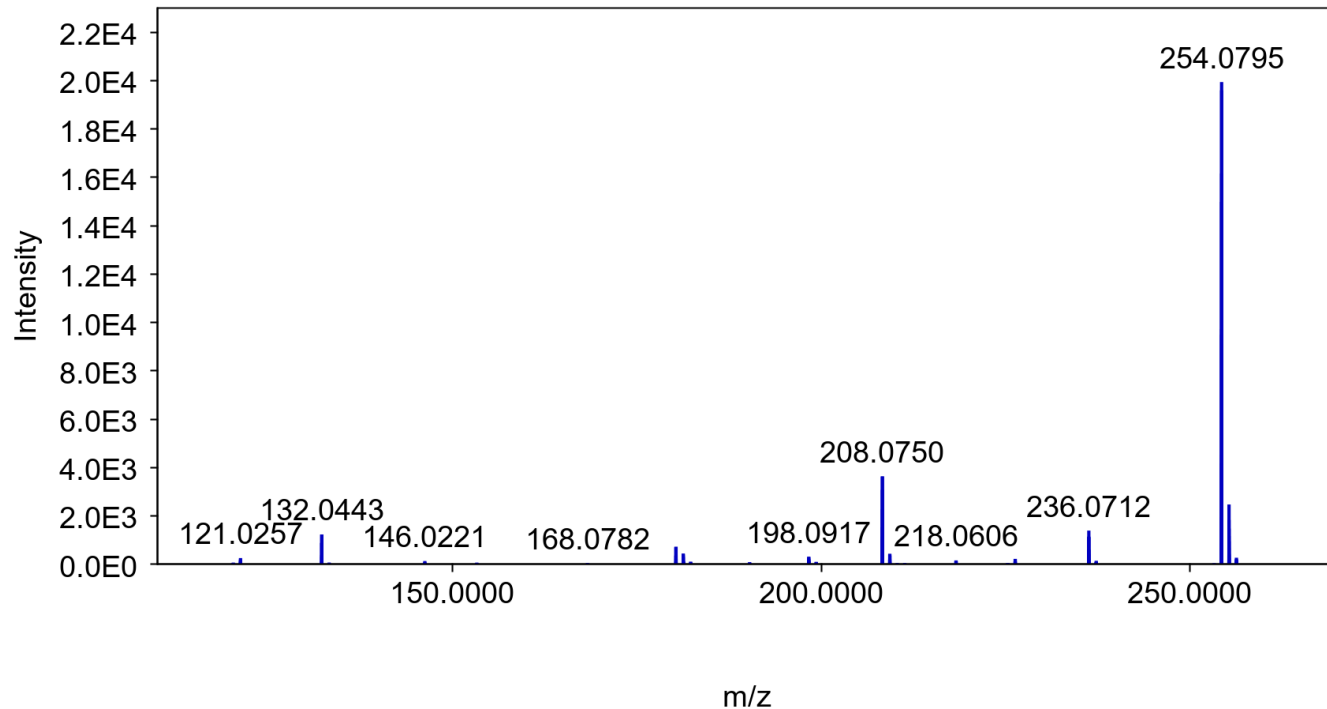

**Figure S32.** MS/MS fragmentation of viridicatol (64).

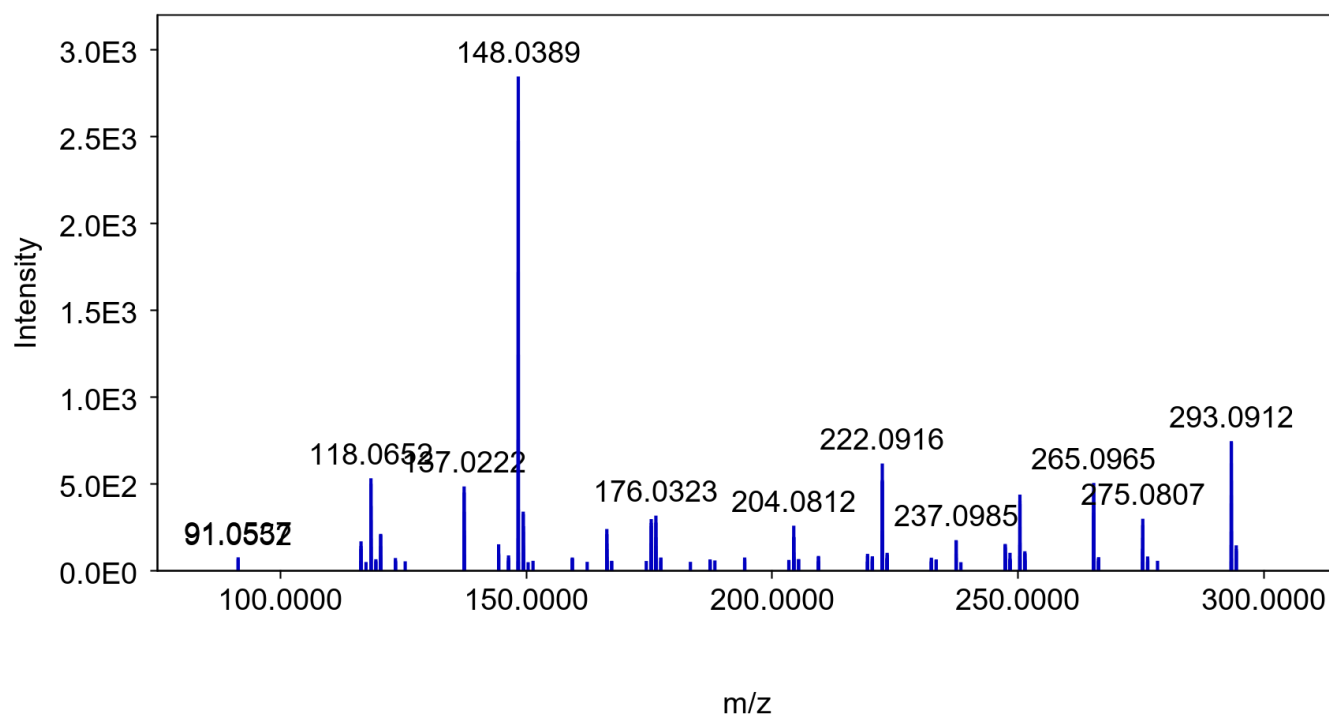

Figure S33. MS/MS fragmentation of citriperazine D (75).

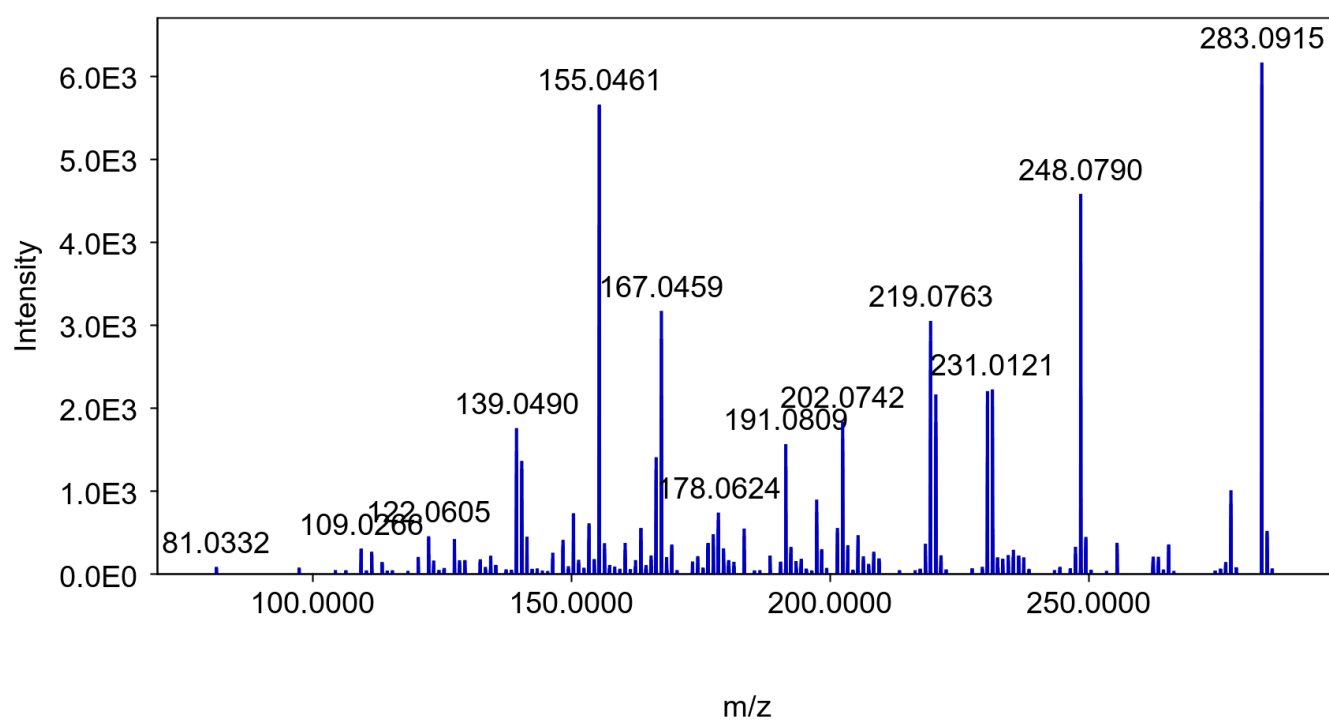

Figure S34. MS/MS fragmentation of pretrichodermamide C (76).

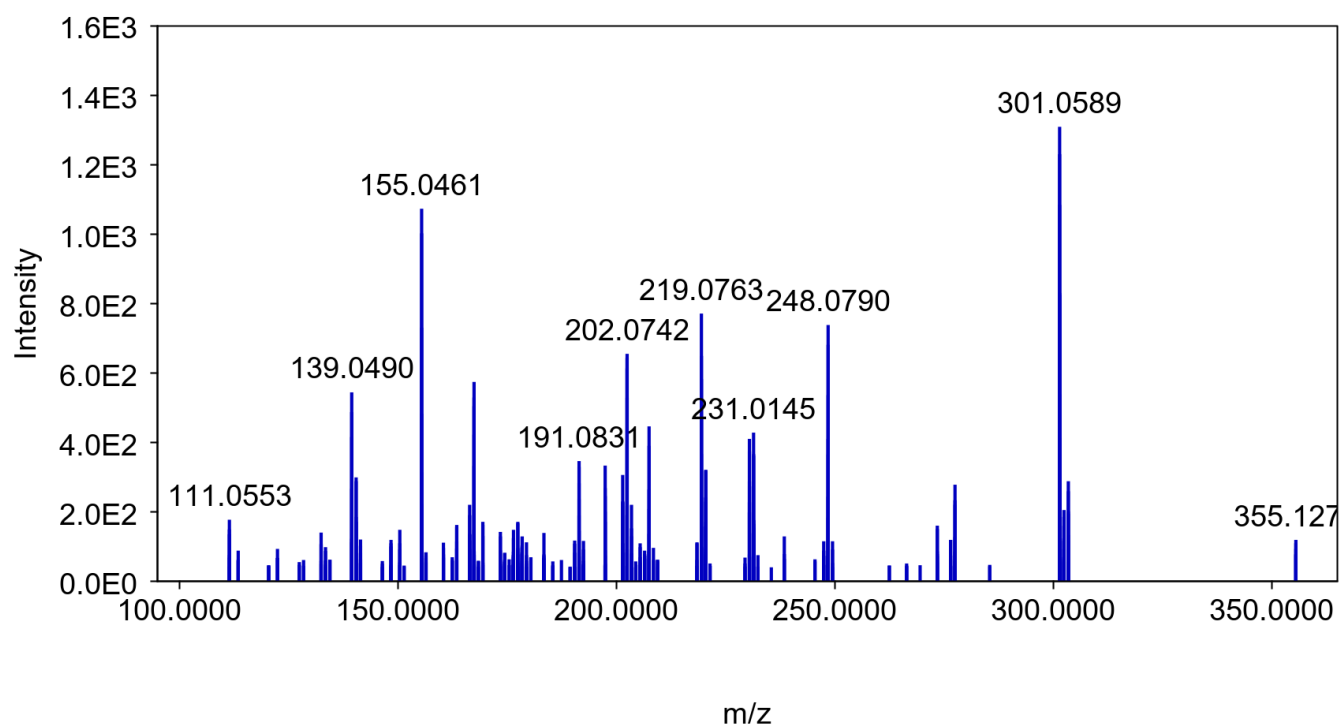

Figure S35. MS/MS fragmentation of N-methylpretichodermamide B (77).

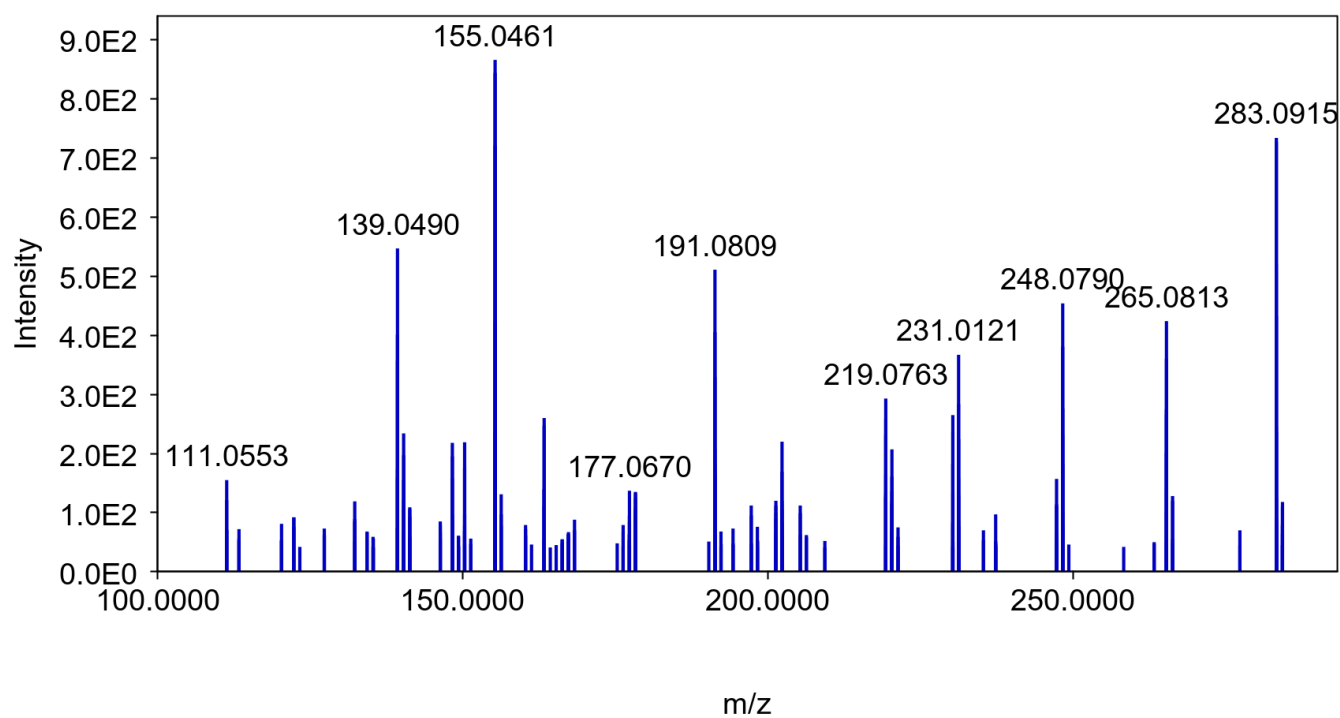

Figure S36. MS/MS fragmentation of pretichodermamide D (78).

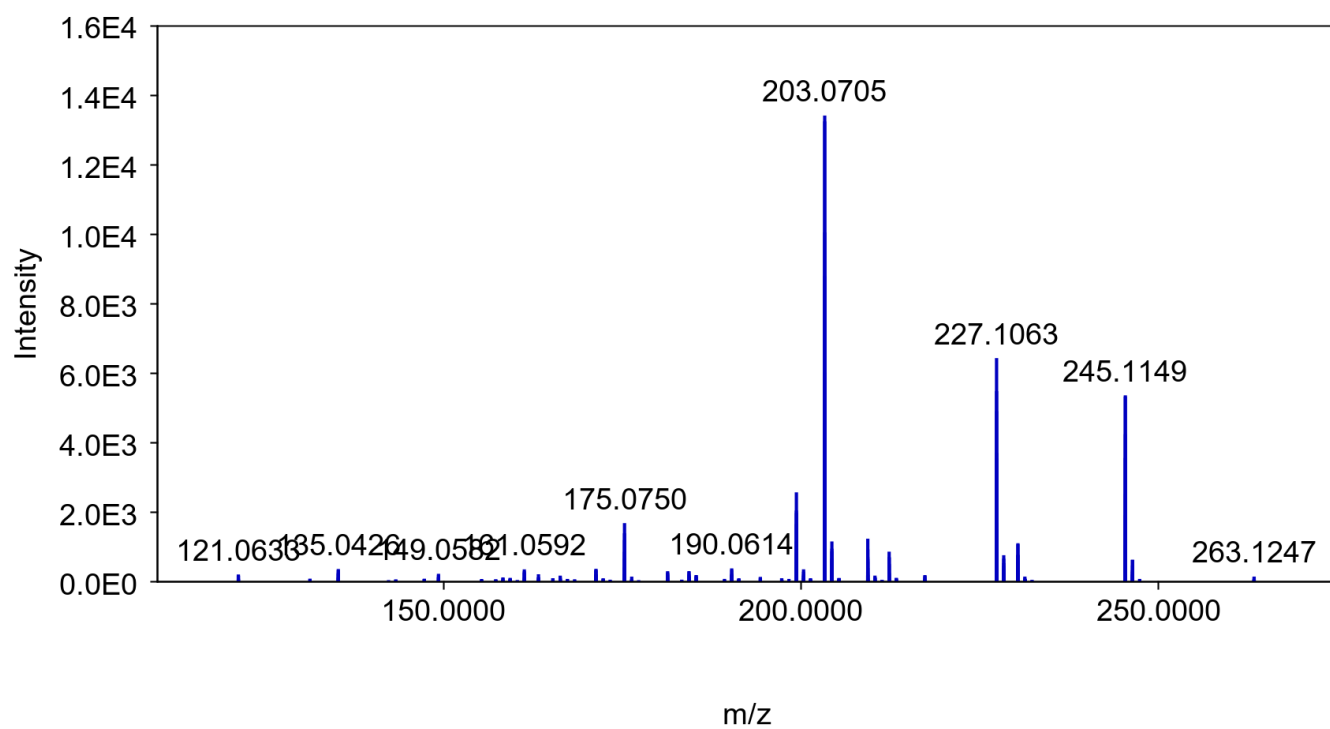

**Figure S37.** MS/MS fragmentation of coniothyronine B (86).

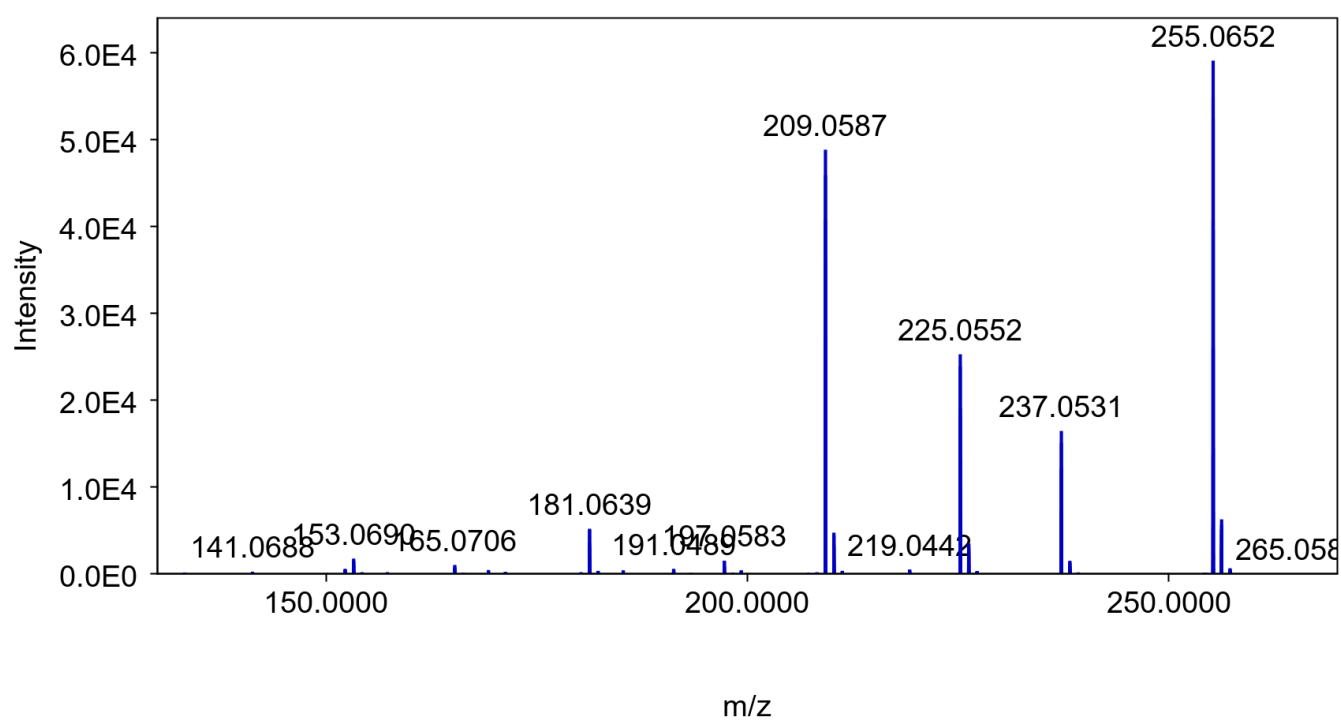

**Figure S38.** MS/MS fragmentation of 9,10-anthracenedione (88).

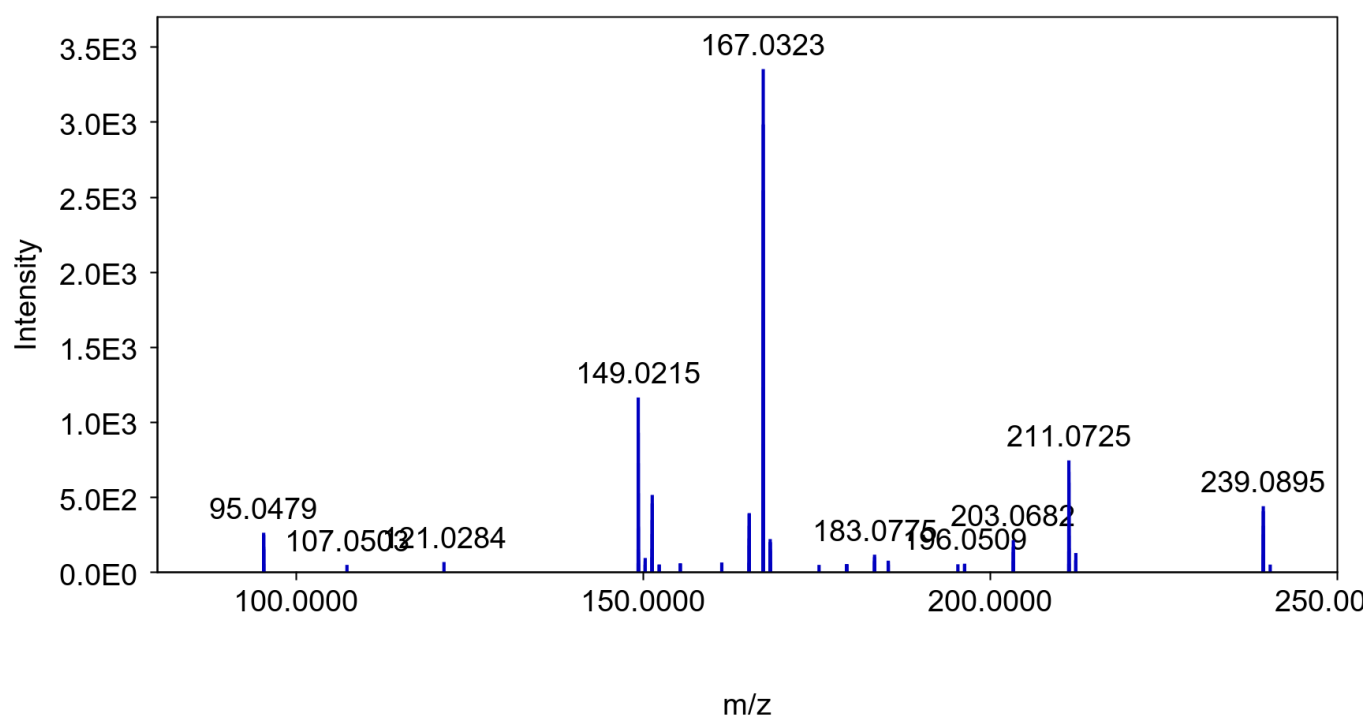

**Figure S39.** MS/MS fragmentation of trans-3,4-dihydroxy-3,4-dihydroanofinic acid (89).

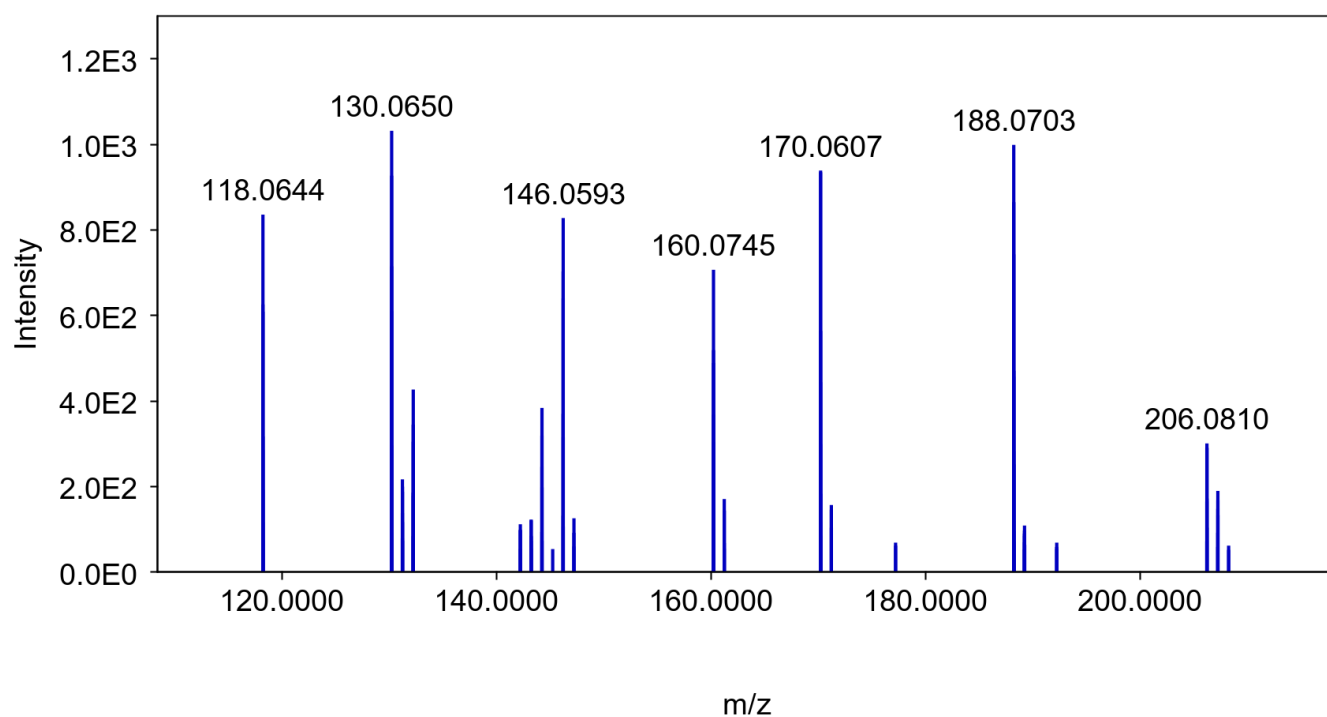

**Figure S40.** MS/MS fragmentation of indolelactic acid (94).

**Table S1.** Experimental UPLC MS data for reference compounds

| N  | Name                                                                | RT   | Measured<br>main peak                           | Calcd<br>[M+H] <sup>+</sup> |
|----|---------------------------------------------------------------------|------|-------------------------------------------------|-----------------------------|
| 1  | verruculogen                                                        | 15.1 | 512.2400<br>[M+H] <sup>+</sup>                  | 512.2391                    |
| 2  | fumitremorgin C                                                     | 10.1 | 380.1971<br>[M+H] <sup>+</sup>                  | 380.1969                    |
| 5  | tryptoquivaline J                                                   | 8.0  | 403.1399<br>[M+H] <sup>+</sup>                  | 403.1401                    |
| 7  | spirotriprostatin A                                                 | 10.4 | 396.1917<br>[M+H] <sup>+</sup>                  | 396.1918                    |
| 8  | 6-methoxyspirotriprostatin B                                        | 7.6  | 394.1756<br>[M+H] <sup>+</sup>                  | 394.1761                    |
| 9  | tryptoquivaline F                                                   | 7.8  | 403.1398<br>[M+H] <sup>+</sup>                  | 403.1401                    |
| 20 | ergosterol peroxide                                                 | 20.4 | 429.3348<br>[M+H] <sup>+</sup>                  | 429.3363                    |
| 24 | 16 $\alpha$ -hydroxy-17 $\beta$ -methoxy-deoxydihydroiso-austamide  | 7.3  | 396.1921<br>[M+H] <sup>+</sup>                  | 396.1918                    |
| 25 | 16 $\beta$ -hydroxy-17 $\alpha$ -methoxy-deoxydihydroiso-austamide  | 7.3  | 396.1921<br>[M+H] <sup>+</sup>                  | 396.1918                    |
| 26 | 16 $\alpha$ -hydroxy-17 $\alpha$ -methoxy-deoxydihydroiso-austamide | 7.3  | 396.1921<br>[M+H] <sup>+</sup>                  | 396.1918                    |
| 27 | 16,17-dihydroxy-deoxydihydroisoaustamide                            | 6.2  | 382.1748<br>[M+H] <sup>+</sup>                  | 382.1761                    |
| 28 | 16 $\beta$ ,17 $\alpha$ -dihydroxy-deoxydihydroisoaustamide         | 6.0  | 382.1748<br>[M+H] <sup>+</sup>                  | 382.1761                    |
| 29 | 16 $\alpha$ ,17 $\alpha$ -dihydroxy-deoxydihydroisoaustamide        | 6.6  | 382.1748<br>[M+H] <sup>+</sup>                  | 382.1761                    |
| 30 | 3 $\beta$ -hydroxydeoxyisoaustamide                                 | 2.9  | 364.1655<br>[M+H] <sup>+</sup>                  | 364.1656                    |
| 31 | deoxy-14,15-dehydroisoaustamide                                     | 10.8 | 346.1544<br>[M+H] <sup>+</sup>                  | 346.1550                    |
| 32 | (+)-deoxyisoaustamide                                               | 7.7  | 348.1713<br>[M+H] <sup>+</sup>                  | 348.1707                    |
| 33 | desoxybrevianamide E                                                | 9.6  | 352.2019<br>[M+H] <sup>+</sup>                  | 352.2020                    |
| 45 | oxirapentyn B                                                       | 9.7  | 335.1496<br>[M+H] <sup>+</sup>                  | 335.1489                    |
| 46 | oxirapentyn E                                                       | 7.2  | 275.1280<br>[M-H <sub>2</sub> O+H] <sup>+</sup> | 275.1278                    |
| 47 | oxirapentyn F                                                       | 7.1  | 353.1593<br>[M+H] <sup>+</sup>                  | 353.1595                    |
| 48 | oxirapentyn G                                                       | 2.2  | 311.1504<br>[M+H] <sup>+</sup>                  | 311.1489                    |



|    |                                                         |      |                                                 |          |
|----|---------------------------------------------------------|------|-------------------------------------------------|----------|
| 49 | oxirapentyn H                                           | 2.9  | 371.1702<br>[M+H] <sup>+</sup>                  | 371.1700 |
| 50 | oxirapentyn I                                           | 2.9  | 371.1702<br>[M+H] <sup>+</sup>                  | 371.1700 |
| 51 | oxirapentyn J                                           | 6.2  | 353.1589<br>[M+H] <sup>+</sup>                  | 353.1595 |
| 52 | isariketide A                                           | 5.7  | 313.0911<br>[M+H] <sup>+</sup>                  | 313.0918 |
| 53 | acremine S                                              | 3.7  | 207.1014<br>[M+H] <sup>+</sup>                  | 207.1016 |
| 54 | diorcin                                                 | 10.4 | 231.1011<br>[M+H] <sup>+</sup>                  | 231.1016 |
| 66 | quinolactacide                                          | 5.4  | 237.0665<br>[M+H] <sup>+</sup>                  | 237.0659 |
| 67 | 3,5-dimethyl-8-methoxy-3,4-dihydro-1H-iso-chromene-6-ol | 8.7  | 209.1171<br>[M+H] <sup>+</sup>                  | 209.1172 |
| 68 | anserinone B                                            | 4.6  | 193.0856<br>[M-H <sub>2</sub> O+H] <sup>+</sup> | 193.0859 |
| 69 | formylanserinone B                                      | 7.5  | 239.0915<br>[M+H] <sup>+</sup>                  | 239.0914 |
| 70 | 6-methyl curvulinic acid                                | 5.3  | 207.0650 [M-H <sub>2</sub> O+H] <sup>+</sup>    | 207.0652 |
| 71 | 4-methoxyisoquinolin-1(2H)-one                          | 2.6  | 176.0702<br>[M+H] <sup>+</sup>                  | 176.0706 |
| 72 | N,N-diethyl-3-methylbenzamide                           | 9.7  | 192.1390<br>[M+H] <sup>+</sup>                  | 192.1383 |
| 73 | 4-hydroxy-3,6-dimethyl-2-pyrone                         | 2.7  | 141.0548<br>[M+H] <sup>+</sup>                  | 141.0546 |
| 74 | hydroxy-N-acetyl-β-oxotriptamine                        | 2.4  | 233.0924<br>[M+H] <sup>+</sup>                  | 233.0921 |
| 75 | citriperazine D                                         | 4.4  | 339.0975<br>[M-H <sub>2</sub> O+H] <sup>+</sup> | 339.0976 |
| 76 | pretrichodermamide C                                    | 5.4  | 513.0990<br>[M+H] <sup>+</sup>                  | 513.1996 |
| 77 | N-methylpretrichodermamide B                            | 8.1  | 531.0647<br>[M+H] <sup>+</sup>                  | 531.0657 |
| 78 | pretrichodermamide D                                    | 5.9  | 513.0990<br>[M+H] <sup>+</sup>                  | 513.0996 |
| 79 | 4-hydroxyscytalone                                      | 2.2  | 211.0604<br>[M+H] <sup>+</sup>                  | 211.0601 |
| 80 | 4-hydroxy-6-dehydroxyscytalone                          | 3.0  | 195.0654<br>[M+H] <sup>+</sup>                  | 195.0652 |
| 81 | 3-methylorsellinic acid                                 | 2.6  | 183.0659                                        | 183.0652 |
| 82 | acruciquinone A                                         | 6.4  | 277.1067<br>[M+H] <sup>+</sup>                  | 277.1071 |
| 83 | acruciquinone C                                         | 4.6  | 279.1227<br>[M+H] <sup>+</sup>                  | 279.1227 |

---

|    |                                                  |      |                                 |          |
|----|--------------------------------------------------|------|---------------------------------|----------|
| 84 | pleosporon                                       | 3.8  | 291.0855<br>[M+H] <sup>+</sup>  | 291.0863 |
| 85 | coniothyrinone D                                 | 4.9  | 279.1226<br>[M+H] <sup>+</sup>  | 279.1227 |
| 86 | coniothyrinone B                                 | 7.0  | 263.1277<br>[M+H] <sup>+</sup>  | 263.1278 |
| 87 | rubrumol                                         | 5.2  | 277.1064<br>[M+H] <sup>+</sup>  | 277.1071 |
| 88 | 9,10-anthracenedione                             | 10.1 | 255.0651<br>[M+H] <sup>+</sup>  | 255.0652 |
| 89 | trans-3,4-dihydroxy-3,4-<br>dihydroanofinic acid | 4.9  | 239.0909<br>[M+H] <sup>+</sup>  | 239.0914 |
| 90 | quadricinctapyran A                              | 7.8  | 221.0815<br>[M+H] <sup>+</sup>  | 221.0808 |
| 91 | 7-hydroxymethyl-1,2-<br>naphthalenediol          | 6.2  | 191.0706<br>[M+H] <sup>+</sup>  | 191.0703 |
| 92 | gliovictin                                       | 8.3  | 377.0962<br>[M+Na] <sup>+</sup> | 377.0964 |
| 93 | acrucipentyn A                                   | 4.1  | 231.0781<br>[M+H] <sup>+</sup>  | 231.0782 |

---
